# Supplementary material for: C74 endohedral metallofullerenes violating the isolated pentagon rule: a density functional theory study
Source: Royal Society of Chemistry journal article supplement (doi:10.1039/c2nr30865g), 2012-01-01
Supplement: c2nr30865g.pdf [file c2nr30865g.pdf]

## Supplementary Information

# **C<sub>74</sub> Endohedral Metallofullerenes Violating the Isolated Pentagon Rule: A Density Functional Theory Study**

*Hong Zheng,<sup>a</sup> Xiang Zhao,\*<sup>a</sup> Ting Ren,<sup>b</sup> and Wei-We Wang<sup>a</sup>*

<sup>a</sup>*Institute for Chemical Physics and Department of Chemistry, State Key Laboratory of Electrical Insulation and Power Equipment, Xi'an Jiaotong University, Xi'an 710049, China*

<sup>b</sup>*Qingzhou Museum, Qingzhou 262500, China*

\*Corresponding Author. [xzhao@mail.xjtu.edu.cn](mailto:xzhao@mail.xjtu.edu.cn)

**Table S1: Relative energies [kcal/mol] and HOMO-LUMO gaps [eV] of  $C_{74}$  anions.**

| Sym.( No.) <sup>a</sup> | PA | $C_{74}^{4-}$ |              |      | $C_{74}^{6-}$ |              |      |
|-------------------------|----|---------------|--------------|------|---------------|--------------|------|
|                         |    | AM1           | B3LYP/6-31G* | gap  | AM1           | B3LYP/6-31G* | gap  |
| $C_2(13333)$            | 2  | 3.69          | 0.00         | 1.55 | 4.39          | 5.31         | 1.50 |
| $D_{3h}(14246)$         | 0  | 0.00          | 4.19         | 0.61 | 0.00          | 6.95         | 1.59 |
| $C_2(13290)$            | 2  | 10.44         | 7.28         | 1.49 | 13.54         | 9.71         | 1.62 |
| $C_2(13295)$            | 2  | 13.09         | 9.86         | 1.17 | 2.94          | 0.00         | 2.12 |
| $C_2(13291)$            | 2  | 18.41         | 14.60        | 1.19 | 17.96         | 14.11        | 1.72 |
| $C_s(13336)$            | 2  | 20.20         | 17.17        | 1.18 | 26.11         | 25.25        | 1.37 |
| $C_1(13408)$            | 2  | 21.43         | 17.52        | 1.10 | 11.64         | 8.89         | 2.07 |
| $C_2(13292)$            | 2  | 24.47         | 21.77        | 0.87 | 20.83         | 18.15        | 1.80 |
| $C_{2v}(14239)$         | 2  | 22.81         | 21.54        | 0.96 | 23.95         | 15.32        | 1.56 |

<sup>a</sup> Symmetry of the original empty cage. The numbers of cages are spiral numbers.

**Table S2.  $\Delta E(S-T)$  [kcal/mol] of  $M_2@C_{74}$  isomers. Vertical  $\Delta E(S-T)$  represents splitting energy without change of geometry structure.**

| Sym.( No.)             | Sc <sub>2</sub> @C <sub>74</sub> | La <sub>2</sub> @C <sub>74</sub> |
|------------------------|----------------------------------|----------------------------------|
| $D_{3h}(14246)$        | 12.67                            | -1.97                            |
| $C_2(13295)$           | -17.04                           | 0.37                             |
| $C_2(13295)$ -vertical | -                                | -8.56                            |
| $C_2(13333)$           | -2.75                            | 6.63                             |
| $C_2(13333)$ -vertical | -                                | 6.63                             |
| $C_1(13408)$           | -11.68                           | -0.11                            |
| $C_2(13291)$           | -10.35                           | 3.51                             |



|         |       |       |       |       |       |       |       |
|---------|-------|-------|-------|-------|-------|-------|-------|
| 5-6     | 1.426 | 1.438 | 2.323 | 1.442 | 2.724 | 1.442 | 2.356 |
| 5-4     | 1.428 | 1.431 | 2.373 | 1.437 | 2.725 | 1.436 | 2.342 |
| 6-7     | 1.439 | 1.469 | 2.345 | 1.474 | 2.729 | 1.470 | 2.434 |
| 7-8     | 1.464 | 1.459 | 2.243 | 1.463 | 2.676 | 1.451 | 2.415 |
| 2-3     | 1.458 | 1.460 | 2.372 | 1.470 | 2.676 | 1.459 | 2.372 |
| 3-4     | 1.439 | 1.448 | 2.485 | 1.464 | 2.737 | 1.462 | 2.400 |
| average | 1.437 | 1.453 | -     | 1.455 | -     | 1.452 | -     |

<sup>a</sup> in triplet state.

**b. BV and DV of PAI in  $C_2(13295)-C_{74}$  EMFs.**

| bond | neutral | $Sc_2@C_2(13295)-C_{74}$ | $La_2@C_2(13295)-C_{74}$ | $Sc_3N@C_2(13295)-C_{74}$ |       |       |       |
|------|---------|--------------------------|--------------------------|---------------------------|-------|-------|-------|
|      | BV/Å    | BV/Å                     | DV/Å                     | BV/Å                      | DV/Å  | BV/Å  | DV/Å  |
| 1-5  | 1.451   | 1.445                    | 2.193                    | 1.435                     | 2.589 | 1.432 | 2.299 |
| 1-8  | 1.423   | 1.45                     | 2.274                    | 1.451                     | 2.661 | 1.456 | 2.329 |
| 1-2  | 1.404   | 1.451                    | 2.300                    | 1.454                     | 2.634 | 1.457 | 2.307 |
| 5-6  | 1.420   | 1.459                    | 2.193                    | 1.456                     | 2.590 | 1.441 | 2.356 |
| 5-4  | 1.403   | 1.465                    | 2.207                    | 1.466                     | 2.553 | 1.443 | 2.342 |
| 6-7  | 1.472   | 1.466                    | 2.260                    | 1.467                     | 2.649 | 1.453 | 2.434 |
| 7-8  | 1.453   | 1.456                    | 2.311                    | 1.463                     | 2.689 | 1.459 | 2.415 |
| 2-3  | 1.456   | 1.456                    | 2.391                    | 1.473                     | 2.632 | 1.461 | 2.372 |
| 3-4  | 1.466   | 1.464                    | 2.328                    | 1.479                     | 2.582 | 1.451 | 2.400 |

**c. BV of PAII (in  $Sc_3N@C_2(13333)-C_{74}$  and  $Sc_3N@C_2(13295)-C_{74}$ ).**

| PA II in $Sc_3N@C_2(13333)-C_{74}$ |       | PA II in $Sc_3N@C_2(13295)-C_{74}$ |       |
|------------------------------------|-------|------------------------------------|-------|
| bond                               | BV/Å  | bond                               | BV/Å  |
| 70-74                              | 1.431 | 72-73                              | 1.423 |
| 70-69                              | 1.421 | 72-60                              | 1.430 |
| 70-71                              | 1.417 | 72-71                              | 1.434 |
| 74-67                              | 1.413 | 73-62                              | 1.433 |
| 74-73                              | 1.432 | 73-74                              | 1.436 |
| 69-68                              | 1.463 | 62-61                              | 1.456 |
| 68-67                              | 1.443 | 61-60                              | 1.450 |
| 71-72                              | 1.476 | 71-70                              | 1.453 |
| 72-73                              | 1.442 | 70-74                              | 1.453 |

**Table S5: NICS [ppm] values of pentagon rings in PA fragments.**

RingA

RingB

|                                 | NICS(-1) | NICS(0) | NICS(1) | NICS(-1) | NICS(0) | NICS(1) |
|---------------------------------|----------|---------|---------|----------|---------|---------|
| $C_2(13333)-C_{74}$             | 6.14     | 14.78   | 3.58    | 31.12    | 43.45   | 17.17   |
| $Sc_2@C_2(13333)-C_{74}$        | -42.2    | -20.93  | -5.91   | -43.9    | -20.81  | -6.43   |
| $La_2@C_2(13333)-C_{74}$        | -28.46   | -12.54  | -4.25   | -32.81   | -14.05  | -4.64   |
| $La_2@C_2(13333)-C_{74-t}$      | -28.66   | -13.73  | -5.07   | -29.72   | -15.00  | -5.37   |
| $Ca_2@C_2(13333)-C_{74}$        | -10.16   | 2.37    | 0.64    | -18.76   | -10.48  | -4.81   |
| $Sc_3N@C_2(13333)-C_{74}(PAI)$  | -39.51   | -19.61  | -6.07   | -38.25   | -20.5   | -6.41   |
| $Sc_3N@C_2(13333)-C_{74}(PAII)$ | -19.85   | -9.09   | -2.95   | -20.38   | -8.51   | -2.49   |
| $C_2(13295)-C_{74}$             | -19.55   | -8.39   | -3.13   | 6.07     | 27.00   | 12.03   |
| $Sc_2@C_2(13295)-C_{74}$        | -46.59   | -23.10  | -6.41   | -35.18   | -19.19  | -5.50   |
| $La_2@C_2(13295)-C_{74}$        | -32.62   | -16.42  | 5.01    | -33.50   | -15.78  | -4.47   |
| $La_2@C_2(13295)-C_{74-t}$      | -        | -       | -       | -        | -       | -       |
| $Ca_2@C_2(13295)-C_{74}$        | -3.61    | 15.59   | 7.2     | -12.81   | -5.96   | -1.44   |
| $Sc_3N@C_2(13295)-C_{74}(PAI)$  | -41.58   | -19.33  | -5.67   | -41.00   | -20.05  | -6.77   |
| $Sc_3N@C_2(13295)-C_{74}(PAII)$ | -23.01   | -12.19  | -4.37   | -21.40   | -12.72  | -4.74   |

**Table S6:**  $^{13}C$  NMR chemical shifts [ppm] of  $Sc_2@C_2(13333)-C_{74}$  and  $Sc_2@C_2(13295)-C_{74}$  predicted at B3LYP/6-31G\*~Lan12DZ and B3LYP/6-311G\*~Lan12DZ levels.

| $Sc_2@C_2(13333)-C_{74}$ |                   | $Sc_2@C_2(13295)-C_{74}$ |                   |
|--------------------------|-------------------|--------------------------|-------------------|
| B3LYP/6-31G*~lan         | B3LYP/6-311G*~lan | B3LYP/6-31G*~lan         | B3LYP/6-311G*~lan |
| 128.00                   | 128.72            | 124.90                   | 125.55            |
| 130.30                   | 131.39            | 130.13                   | 130.77            |
| 131.23                   | 132.41            | 131.05                   | 131.94            |
| 133.28                   | 134.47            | 131.48                   | 132.15            |
| 133.60                   | 135.00            | 131.91                   | 132.61            |
| 133.76                   | 135.08            | 132.28                   | 133.57            |
| 134.59                   | 135.87            | 133.19                   | 134.15            |
| 135.04                   | 136.12            | 133.85                   | 134.49            |
| 135.15                   | 136.37            | 134.32                   | 136.50            |
| 135.66                   | 136.86            | 138.72                   | 139.84            |
| 136.76                   | 137.88            | 139.22                   | 141.39            |
| 137.84                   | 139.92            | 139.95                   | 141.66            |
| 137.97                   | 140.00            | 140.13                   | 142.41            |
| 138.09                   | 140.21            | 141.20                   | 142.54            |
| 138.36                   | 140.74            | 141.42                   | 143.07            |

---

|        |        |        |        |
|--------|--------|--------|--------|
| 139.27 | 140.75 | 141.56 | 143.38 |
| 139.40 | 140.82 | 141.66 | 143.44 |
| 139.95 | 142.12 | 141.87 | 143.97 |
| 140.00 | 142.15 | 142.12 | 144.05 |
| 141.59 | 143.69 | 142.30 | 144.90 |
| 141.67 | 144.23 | 142.96 | 145.04 |
| 141.99 | 144.96 | 143.07 | 145.29 |
| 142.62 | 145.05 | 145.06 | 147.49 |
| 142.79 | 145.29 | 145.27 | 147.66 |
| 144.10 | 146.63 | 146.56 | 149.47 |
| 144.19 | 146.74 | 147.21 | 149.94 |
| 144.86 | 147.45 | 147.53 | 150.65 |
| 145.07 | 147.46 | 148.51 | 151.07 |
| 145.51 | 147.64 | 149.53 | 152.57 |
| 147.14 | 149.08 | 151.31 | 153.94 |
| 147.38 | 150.80 | 152.45 | 156.25 |
| 148.31 | 151.09 | 153.43 | 157.00 |
| 148.82 | 151.65 | 153.45 | 157.09 |
| 149.22 | 152.62 | 153.53 | 157.85 |
| 150.51 | 153.27 | 155.59 | 159.47 |
| 151.78 | 154.28 | 157.04 | 160.11 |
| 156.71 | 161.50 | 159.12 | 164.48 |

---

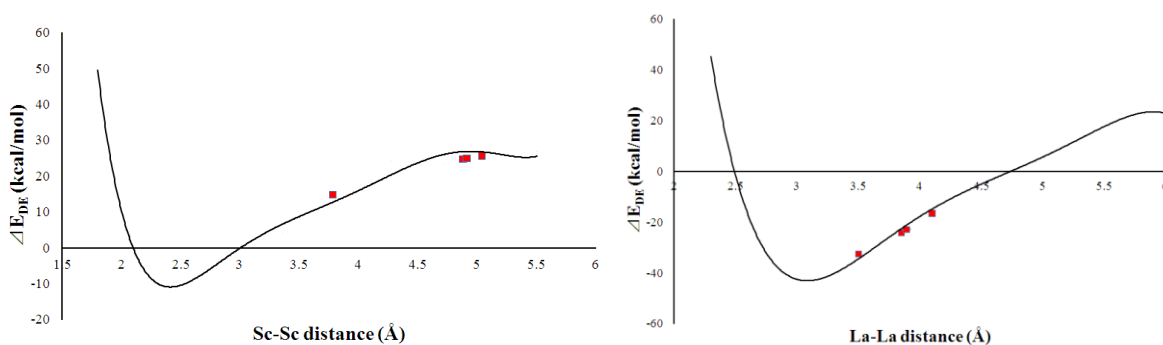

**Figure S1:  $\Delta E_{DE}$ ~M-M distance correlation maps. Red dots represent  $\Delta E_{DE}$  and M-M distance in  $M_2@C_{74}$  isomers.**

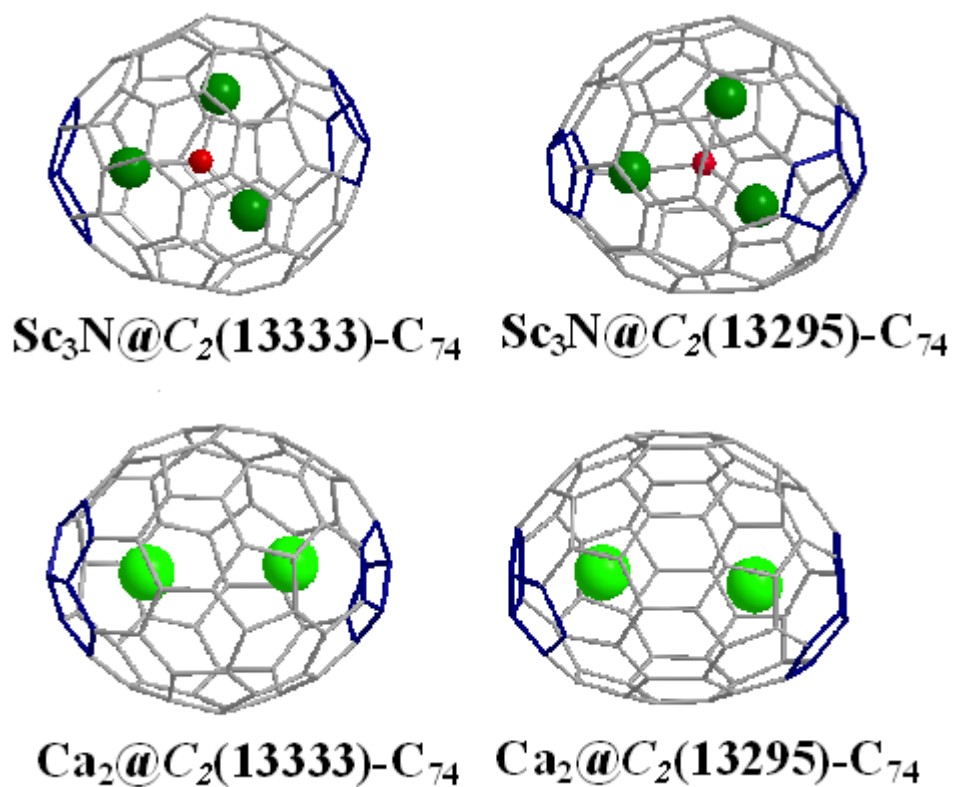

**Figure S2: Geometry structures of Sc<sub>3</sub>N@C<sub>74</sub> and Ca<sub>2</sub>@C<sub>74</sub> isomers (adjacent pentagons are colored with blue).**

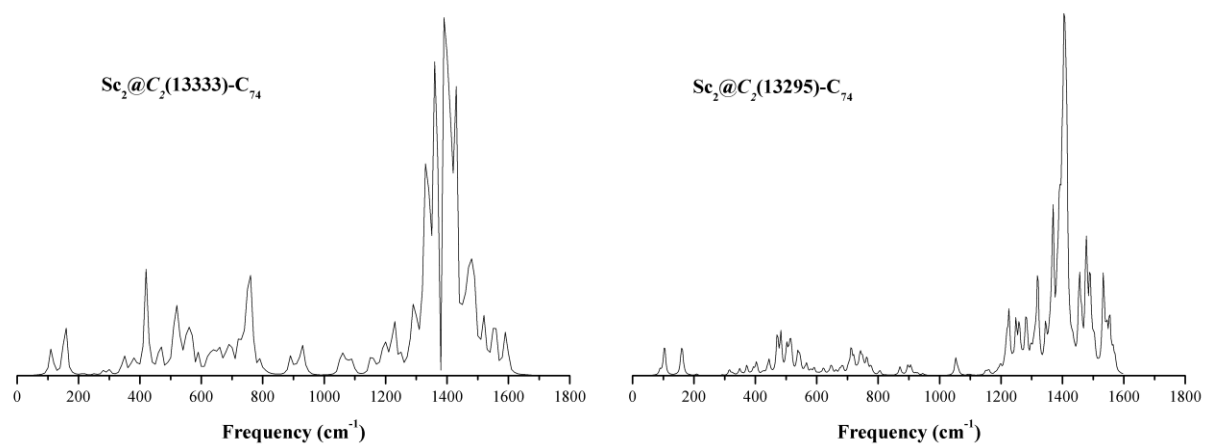

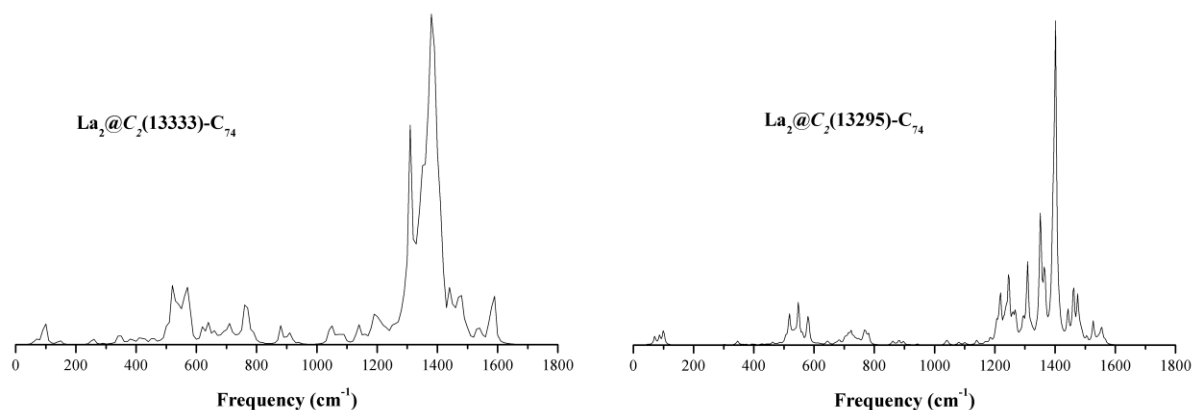

**Figure S3: Simulated infrared spectra of  $M_2@C_{74}$ .**

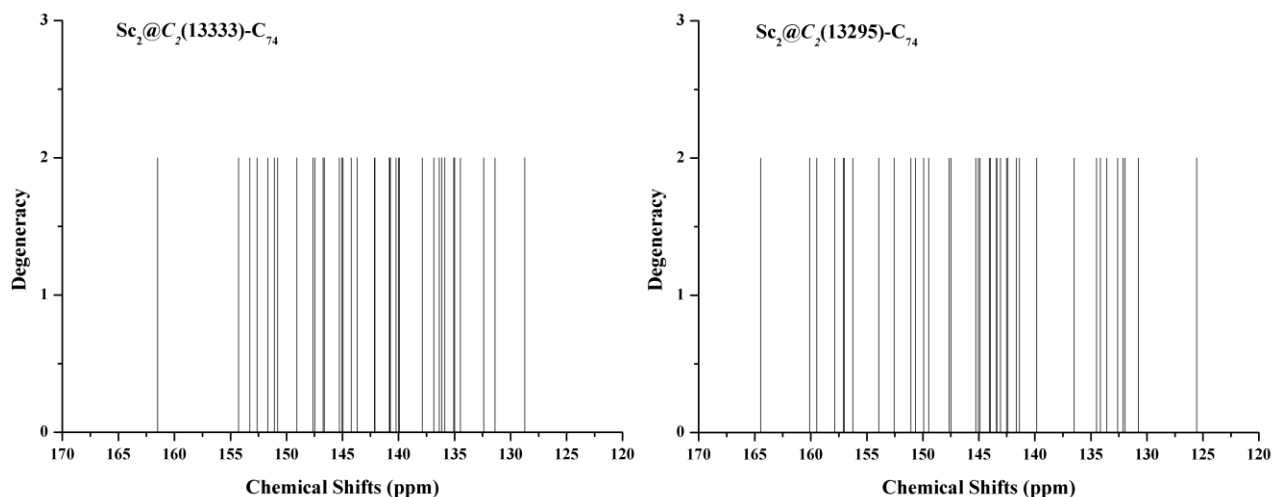

**Figure S4: Simulated  $^{13}C$  NMR spectra of  $Sc_2@C_{74}$ .**

**Coordinates of main  $C_{74}$  EMF isomers predicted at B3LYP/6-31g\*~lan level.**

$Sc_2@C_{74}$  series:

$Sc_2@C_2(13333)-C_{74}$

76

|   |           |           |           |
|---|-----------|-----------|-----------|
| C | -4.583640 | -0.113325 | -0.037979 |
| C | -4.103709 | -0.946620 | 1.066883  |
| C | -3.482239 | -2.124855 | 0.469753  |
| C | -3.494058 | -1.978639 | -0.971118 |
| C | -4.168390 | -0.751486 | -1.268298 |
| C | -3.568419 | 0.211493  | -2.151127 |
| C | -3.604688 | 1.501143  | -1.448017 |
| C | -4.235856 | 1.297605  | -0.147953 |



---

|   |           |           |           |
|---|-----------|-----------|-----------|
| C | -3.590390 | 1.886497  | 0.992691  |
| C | -3.253811 | 1.097412  | 2.177462  |
| C | -3.440469 | -0.339281 | 2.220535  |
| C | -2.443450 | -1.097168 | 2.889081  |
| C | -1.975260 | -2.376581 | 2.377406  |
| C | -2.426356 | -2.861569 | 1.115468  |
| C | -1.503989 | -3.550690 | 0.278353  |
| C | -1.503548 | -3.348424 | -1.162285 |
| C | -2.395373 | -2.429479 | -1.781375 |
| C | -1.903005 | -1.541609 | -2.846904 |
| C | -2.450663 | -0.171270 | -2.962614 |
| C | -1.598800 | 0.884774  | -3.400513 |
| C | -1.632985 | 2.185203  | -2.712558 |
| C | -2.520288 | 2.452184  | -1.644732 |
| C | -2.020012 | 3.204146  | -0.478337 |
| C | -2.550740 | 2.865571  | 0.819068  |
| C | -1.685187 | 2.807546  | 1.965264  |
| C | -2.093209 | 1.699552  | 2.778970  |
| C | -1.123637 | 0.928459  | 3.506771  |
| C | -1.331315 | -0.479079 | 3.573009  |
| C | -0.219661 | -1.385510 | 3.537945  |
| C | -0.615054 | -2.545510 | 2.776773  |
| C | 0.318377  | -3.218074 | 1.925011  |
| C | -0.145802 | -3.750721 | 0.693938  |
| C | 0.700732  | -3.721575 | -0.487939 |
| C | -0.154383 | -3.480140 | -1.612895 |
| C | 0.293975  | -2.715091 | -2.693749 |
| C | -0.577883 | -1.756265 | -3.311811 |
| C | 0.255473  | -0.663714 | -3.770546 |
| C | -0.254237 | 0.641350  | -3.774448 |
| C | 0.578922  | 1.736577  | -3.321897 |
| C | -0.293106 | 2.699149  | -2.709972 |
| C | 0.154948  | 3.470649  | -1.633528 |
| C | -0.700501 | 3.718644  | -0.510245 |
| C | 0.145715  | 3.754741  | 0.671688  |
| C | -0.318834 | 3.229496  | 1.905773  |
| C | 0.614356  | 2.562029  | 2.761791  |

---

|    |           |           |           |
|----|-----------|-----------|-----------|
| C  | 0.218727  | 1.406639  | 3.529805  |
| C  | 1.330419  | 0.500420  | 3.570635  |
| C  | 1.122751  | -0.907480 | 3.512517  |
| C  | 2.092483  | -1.682908 | 2.789567  |
| C  | 1.684716  | -2.795823 | 1.982412  |
| C  | 2.550505  | -2.860544 | 0.836770  |
| C  | 2.020261  | -3.206885 | -0.458738 |
| C  | 2.520949  | -2.461890 | -1.629499 |
| C  | 1.633885  | -2.201221 | -2.699055 |
| C  | 1.599913  | -0.904882 | -3.394851 |
| C  | 2.451575  | 0.153737  | -2.962693 |
| C  | 1.903955  | 1.524725  | -2.855391 |
| C  | 2.396047  | 2.419023  | -1.795105 |
| C  | 1.504016  | 3.341647  | -1.181780 |
| C  | 1.503971  | 3.552239  | 0.257708  |
| C  | 2.426119  | 2.868187  | 1.099195  |
| C  | 1.974700  | 2.390733  | 2.363913  |
| C  | 2.442788  | 1.114481  | 2.883460  |
| C  | 3.439679  | 0.352570  | 2.219379  |
| C  | 3.253132  | -1.084286 | 2.184770  |
| C  | 3.590063  | -1.880341 | 1.004792  |
| C  | 4.235906  | -1.298394 | -0.139079 |
| C  | 3.605533  | -1.509804 | -1.438271 |
| C  | 3.569459  | -0.224248 | -2.149023 |
| C  | 4.168829  | 0.744011  | -1.271597 |
| C  | 3.494544  | 1.972980  | -0.981915 |
| C  | 3.482098  | 2.127629  | 0.458090  |
| C  | 4.102918  | 0.952808  | 1.062195  |
| C  | 4.583251  | 0.113126  | -0.037327 |
| Sc | -2.438870 | 0.072646  | -0.060259 |
| Sc | 2.438085  | -0.073729 | -0.060792 |

Sc<sub>2</sub>@C<sub>2</sub>(13295)-C<sub>74</sub>

76

|   |          |           |           |
|---|----------|-----------|-----------|
| C | 4.328823 | -0.765363 | -1.306088 |
| C | 4.024670 | -1.634175 | -0.184396 |
| C | 4.060687 | -0.812593 | 1.017058  |

---

|   |           |           |           |
|---|-----------|-----------|-----------|
| C | 4.339863  | 0.571079  | 0.627168  |
| C | 4.537251  | 0.581008  | -0.824602 |
| C | 3.762977  | 1.476093  | -1.677974 |
| C | 3.031242  | 0.669525  | -2.659676 |
| C | 3.433548  | -0.713508 | -2.445047 |
| C | 2.468363  | -1.725651 | -2.564544 |
| C | 2.343007  | -2.782710 | -1.584947 |
| C | 3.045439  | -2.683868 | -0.319289 |
| C | 2.337656  | -3.080986 | 0.847359  |
| C | 2.430968  | -2.322315 | 2.076361  |
| C | 3.209452  | -1.129760 | 2.145410  |
| C | 2.683569  | -0.035942 | 2.898416  |
| C | 2.845599  | 1.328794  | 2.436319  |
| C | 3.582114  | 1.636227  | 1.263104  |
| C | 3.037658  | 2.676651  | 0.407736  |
| C | 3.053488  | 2.520346  | -1.032514 |
| C | 1.807980  | 3.003841  | -1.555484 |
| C | 1.106896  | 2.257593  | -2.566319 |
| C | 1.649020  | 0.984480  | -3.027935 |
| C | 0.725214  | -0.112326 | -3.322779 |
| C | 1.169937  | -1.457570 | -3.128735 |
| C | 0.288259  | -2.471661 | -2.650681 |
| C | 1.001251  | -3.256337 | -1.652863 |
| C | 0.325744  | -3.716537 | -0.483604 |
| C | 1.009993  | -3.627668 | 0.765554  |
| C | 0.299078  | -3.258171 | 1.959564  |
| C | 1.161384  | -2.420128 | 2.747912  |
| C | 0.628325  | -1.317653 | 3.482134  |
| C | 1.414951  | -0.127427 | 3.559075  |
| C | 0.792517  | 1.173470  | 3.523813  |
| C | 1.653942  | 2.058750  | 2.802423  |
| C | 1.115319  | 3.071522  | 1.950976  |
| C | 1.824337  | 3.364560  | 0.742022  |
| C | 1.096993  | 3.623296  | -0.475617 |
| C | -0.325617 | 3.716694  | -0.485634 |
| C | -1.000813 | 3.255955  | -1.654850 |
| C | -0.287546 | 2.470734  | -2.652070 |

---

|    |           |           |           |
|----|-----------|-----------|-----------|
| C  | -1.169144 | 1.456390  | -3.129797 |
| C  | -0.724401 | 0.111067  | -3.323077 |
| C  | -1.648183 | -0.985661 | -3.027797 |
| C  | -1.106214 | -2.258503 | -2.565407 |
| C  | -1.807661 | -3.004285 | -1.554418 |
| C  | -1.096865 | -3.623083 | -0.474000 |
| C  | -1.824493 | -3.363758 | 0.743270  |
| C  | -1.115748 | -3.070185 | 1.952243  |
| C  | -1.654539 | -2.056930 | 2.802964  |
| C  | -0.793343 | -1.171312 | 3.524200  |
| C  | -1.415786 | 0.129598  | 3.558685  |
| C  | -0.629128 | 1.319801  | 3.481292  |
| C  | -1.162021 | 2.421853  | 2.746348  |
| C  | -0.299509 | 3.259439  | 1.957787  |
| C  | -1.010171 | 3.628436  | 0.763428  |
| C  | -2.337829 | 3.081827  | 0.845185  |
| C  | -3.045252 | 2.684057  | -0.321488 |
| C  | -2.342630 | 2.782388  | -1.587043 |
| C  | -2.467680 | 1.724864  | -2.566122 |
| C  | -3.432314 | 0.712466  | -2.445662 |
| C  | -3.030329 | -0.670592 | -2.659713 |
| C  | -3.762961 | -1.476914 | -1.678366 |
| C  | -3.053549 | -2.520901 | -1.032130 |
| C  | -3.037943 | -2.676205 | 0.408302  |
| C  | -3.582798 | -1.635406 | 1.263147  |
| C  | -2.846070 | -1.327147 | 2.436079  |
| C  | -2.684121 | 0.037807  | 2.897664  |
| C  | -3.209908 | 1.131230  | 2.144018  |
| C  | -2.431503 | 2.323772  | 2.074546  |
| C  | -4.060934 | 0.813282  | 1.015719  |
| C  | -4.024136 | 1.634148  | -0.186128 |
| C  | -4.327875 | 0.764732  | -1.307196 |
| C  | -4.537362 | -0.581308 | -0.825405 |
| C  | -4.340808 | -0.570649 | 0.626656  |
| Sc | 2.450300  | 0.115154  | -0.508590 |
| Sc | -2.450395 | -0.118750 | -0.506992 |

---

Sc<sub>2</sub>@D<sub>3h</sub>(14246)-C<sub>74</sub>

76

|   |           |           |           |
|---|-----------|-----------|-----------|
| C | 3.999225  | -1.334455 | 0.136598  |
| C | 3.841788  | -0.404183 | 1.235406  |
| C | 3.719934  | 0.924905  | 0.710974  |
| C | 3.765711  | 0.846793  | -0.728548 |
| C | 3.976308  | -0.543948 | -1.106190 |
| C | 3.234861  | -1.026466 | -2.252473 |
| C | 2.492873  | -2.276384 | -2.150797 |
| C | 2.492632  | -3.034945 | -0.937880 |
| C | 3.262649  | -2.573626 | 0.220607  |
| C | 2.463265  | -2.852908 | 1.386078  |
| C | 2.446554  | -1.982929 | 2.516683  |
| C | 3.134615  | -0.738702 | 2.429921  |
| C | 2.367096  | 0.265189  | 3.122398  |
| C | 2.297239  | 1.613351  | 2.648835  |
| C | 3.000516  | 1.961985  | 1.404546  |
| C | 2.522403  | 3.018080  | 0.599011  |
| C | 2.546311  | 2.948995  | -0.853467 |
| C | 3.039231  | 1.810182  | -1.530119 |
| C | 2.319678  | 1.312206  | -2.710481 |
| C | 2.400084  | -0.104271 | -2.989419 |
| C | 1.233020  | -0.808546 | -3.434652 |
| C | 1.254300  | -2.137637 | -2.870823 |
| C | 0.048280  | -2.816003 | -2.486004 |
| C | 0.054422  | -3.578930 | -1.244618 |
| C | 1.261095  | -3.603173 | -0.473446 |
| C | 1.251761  | -3.500231 | 0.983524  |
| C | 0.040709  | -3.333566 | 1.713974  |
| C | 0.024657  | -2.452376 | 2.906919  |
| C | 1.232827  | -1.777797 | 3.252401  |
| C | 1.213932  | -0.389558 | 3.675235  |
| C | -0.018272 | 0.304158  | 3.821365  |
| C | -0.036056 | 1.692108  | 3.501080  |
| C | 1.129609  | 2.357305  | 2.976468  |
| C | 0.669981  | 3.437006  | 2.145870  |
| C | 1.360775  | 3.790831  | 0.988604  |

---

|   |           |           |           |
|---|-----------|-----------|-----------|
| C | 0.644715  | 4.170249  | -0.203747 |
| C | 1.378030  | 3.654279  | -1.335781 |
| C | 0.689643  | 3.163558  | -2.442922 |
| C | 1.156619  | 1.994067  | -3.144753 |
| C | -0.003090 | 1.282513  | -3.641146 |
| C | 0.016265  | -0.126713 | -3.722470 |
| C | -1.182699 | -0.842434 | -3.446984 |
| C | -1.170979 | -2.172627 | -2.883244 |
| C | -2.406365 | -2.340782 | -2.165402 |
| C | -2.395708 | -3.097367 | -0.954563 |
| C | -1.154268 | -3.637464 | -0.481343 |
| C | -1.159074 | -3.535697 | 0.975194  |
| C | -2.390052 | -2.917316 | 1.366742  |
| C | -2.404747 | -2.047555 | 2.496094  |
| C | -1.205383 | -1.810064 | 3.243303  |
| C | -1.229789 | -0.423335 | 3.666122  |
| C | -2.397556 | 0.200151  | 3.104762  |
| C | -2.360787 | 1.550836  | 2.630569  |
| C | -1.217697 | 2.326201  | 2.966811  |
| C | -0.782596 | 3.417467  | 2.140499  |
| C | -1.474689 | 3.753397  | 0.977329  |
| C | -0.759398 | 4.150943  | -0.209356 |
| C | -1.469090 | 3.615828  | -1.347692 |
| C | -0.757337 | 3.143573  | -2.448549 |
| C | -1.185662 | 1.962310  | -3.154249 |
| C | -2.331948 | 1.247728  | -2.728025 |
| C | -2.370496 | -0.169430 | -3.006840 |
| C | -3.181941 | -1.112129 | -2.271902 |
| C | -3.950870 | -0.652485 | -1.135656 |
| C | -3.965272 | -1.444053 | 0.106930  |
| C | -3.190109 | -2.660670 | 0.196098  |
| C | -3.840702 | -0.508685 | 1.206307  |
| C | -3.128816 | -0.821978 | 2.404955  |
| C | -3.751253 | 0.823645  | 0.682418  |
| C | -3.064314 | 1.879694  | 1.381155  |
| C | -2.610277 | 2.949362  | 0.579008  |
| C | -2.620758 | 2.878453  | -0.874882 |

---

|    |           |           |           |
|----|-----------|-----------|-----------|
| C  | -3.075609 | 1.726162  | -1.554271 |
| C  | -3.783388 | 0.744135  | -0.757522 |
| Sc | 1.906819  | -0.743238 | -0.411687 |
| Sc | -1.894410 | -0.778540 | -0.394193 |

Sc<sub>2</sub>@C<sub>I</sub>(13408)-C<sub>74</sub>

76

|   |           |           |           |
|---|-----------|-----------|-----------|
| C | 4.116691  | 0.782031  | 0.932450  |
| C | 3.228026  | 1.106401  | 2.046651  |
| C | 4.403571  | -0.607916 | 0.571977  |
| C | 4.064728  | 1.566708  | -0.304680 |
| C | 2.636774  | 0.013953  | 2.831905  |
| C | 2.507649  | 2.330790  | 1.951296  |
| C | 4.502815  | -0.690908 | -0.880148 |
| C | 3.655776  | -1.624467 | 1.230173  |
| C | 4.308799  | 0.644282  | -1.400755 |
| C | 3.081729  | 2.611508  | -0.470282 |
| C | 2.862413  | -1.344417 | 2.389654  |
| C | 1.429767  | 0.250238  | 3.541280  |
| C | 2.407789  | 3.072855  | 0.695147  |
| C | 1.277657  | 2.533083  | 2.655820  |
| C | 3.643190  | -1.600724 | -1.641883 |
| C | 3.001730  | -2.701792 | 0.486930  |
| C | 3.376079  | 0.571749  | -2.499753 |
| C | 2.367444  | 2.699059  | -1.727093 |
| C | 1.820927  | -2.328624 | 2.455535  |
| C | 0.756080  | 1.510112  | 3.457137  |
| C | 0.407377  | -0.776155 | 3.687622  |
| C | 1.101020  | 3.646499  | 0.629467  |
| C | 0.396152  | 3.331872  | 1.854517  |
| C | 2.902507  | -2.632482 | -0.949854 |
| C | 2.940245  | -0.795161 | -2.649509 |
| C | 1.891909  | -3.149008 | 1.272206  |
| C | 2.447551  | 1.612036  | -2.685150 |
| C | 1.036878  | 3.201752  | -1.774602 |
| C | 0.572008  | -2.056854 | 3.094566  |
| C | -0.659458 | 1.291511  | 3.511812  |

|   |           |           |           |
|---|-----------|-----------|-----------|
| C | -0.870236 | -0.134174 | 3.697971  |
| C | 0.390025  | 3.722381  | -0.608156 |
| C | -1.013212 | 3.131590  | 1.874345  |
| C | 1.682935  | -3.068690 | -1.534700 |
| C | 1.576763  | -1.083589 | -3.064375 |
| C | 0.698579  | -3.675276 | 0.670259  |
| C | 1.133679  | 1.348284  | -3.189852 |
| C | 0.284925  | 2.396487  | -2.709607 |
| C | -0.585705 | -2.728283 | 2.592939  |
| C | -1.555928 | 2.080264  | 2.746651  |
| C | -2.016465 | -0.778565 | 3.157410  |
| C | -1.021672 | 3.675539  | -0.564273 |
| C | -1.734252 | 3.466835  | 0.677734  |
| C | 0.633013  | -3.672233 | -0.759785 |
| C | 1.056428  | -2.323150 | -2.608365 |
| C | 0.649493  | 0.009369  | -3.351357 |
| C | -0.521465 | -3.534178 | 1.394597  |
| C | -1.110350 | 2.228013  | -2.589633 |
| C | -1.868812 | -2.108263 | 2.645910  |
| C | -2.803608 | 1.459903  | 2.380525  |
| C | -3.018916 | 0.044167  | 2.563552  |
| C | -1.784298 | 3.036429  | -1.615638 |
| C | -2.981889 | 2.849096  | 0.361429  |
| C | -0.611623 | -3.437377 | -1.433031 |
| C | -0.343232 | -2.561802 | -2.559412 |
| C | -0.791750 | -0.205666 | -3.250094 |
| C | -1.774672 | -3.402780 | 0.715392  |
| C | -1.685957 | 0.940288  | -2.986538 |
| C | -2.640255 | -2.550769 | 1.510207  |
| C | -3.543364 | 1.868366  | 1.233106  |
| C | -3.887259 | -0.433985 | 1.513585  |
| C | -3.035594 | 2.627318  | -1.056401 |
| C | -1.826647 | -3.342320 | -0.706272 |
| C | -1.265361 | -1.557257 | -2.948783 |
| C | -3.063511 | 0.703959  | -2.626897 |
| C | -3.668233 | -1.749218 | 0.933641  |
| C | -4.259849 | 0.731378  | 0.701466  |



---

|    |           |           |           |
|----|-----------|-----------|-----------|
| C  | -3.714651 | 1.496681  | -1.586826 |
| C  | -2.869832 | -2.542125 | -1.282207 |
| C  | -2.601518 | -1.724634 | -2.447450 |
| C  | -3.532359 | -0.649347 | -2.452974 |
| C  | -3.905962 | -1.887727 | -0.496375 |
| C  | -4.478762 | 0.600446  | -0.714421 |
| C  | -4.377479 | -0.740575 | -1.278298 |
| Sc | -2.426188 | -0.161045 | -0.542550 |
| Sc | 2.475621  | -0.122597 | -0.389288 |

Sc<sub>2</sub>@C<sub>2v</sub>(14239)-C<sub>74</sub>

76

|   |          |           |           |
|---|----------|-----------|-----------|
| C | 4.053103 | -1.170133 | -0.873573 |
| C | 3.147134 | -2.192291 | -1.300755 |
| C | 2.699420 | -2.893827 | -0.110470 |
| C | 3.260548 | -2.226856 | 1.058922  |
| C | 4.124287 | -1.182970 | 0.570893  |
| C | 4.007981 | 0.170927  | 1.051408  |
| C | 3.912216 | 1.021792  | -0.129323 |
| C | 3.884256 | 0.185270  | -1.312910 |
| C | 2.995926 | 0.492672  | -2.415419 |
| C | 2.200403 | -0.607164 | -3.013888 |
| C | 2.234786 | -1.950224 | -2.397554 |
| C | 1.082655 | -2.779392 | -2.431205 |
| C | 0.676103 | -3.586320 | -1.290175 |
| C | 1.426784 | -3.558389 | -0.076191 |
| C | 0.755261 | -3.574141 | 1.177882  |
| C | 1.253179 | -2.783225 | 2.298175  |
| C | 2.428473 | -1.991078 | 2.218218  |
| C | 2.436254 | -0.648018 | 2.849063  |
| C | 3.191796 | 0.458125  | 2.212750  |
| C | 2.670766 | 1.782543  | 2.297339  |
| C | 2.648084 | 2.671495  | 1.137832  |
| C | 3.206418 | 2.275204  | -0.104306 |
| C | 2.586519 | 2.707593  | -1.300028 |
| C | 2.506565 | 1.822307  | -2.467924 |
| C | 1.294474 | 2.130533  | -3.158416 |

|   |           |           |           |
|---|-----------|-----------|-----------|
| C | 0.580496  | 1.120058  | -3.823259 |
| C | 1.038596  | -0.247178 | -3.756668 |
| C | -0.131911 | -1.085834 | -3.728463 |
| C | -0.108860 | -2.306928 | -3.065917 |
| C | -1.251248 | -2.755371 | -2.332991 |
| C | -0.752809 | -3.559751 | -1.222598 |
| C | -1.424191 | -3.560186 | 0.031567  |
| C | -0.673466 | -3.602828 | 1.245165  |
| C | -1.080652 | -2.810241 | 2.395997  |
| C | 0.110371  | -2.345216 | 3.037023  |
| C | 0.132399  | -1.131852 | 3.713496  |
| C | 1.303712  | -0.291778 | 3.633412  |
| C | 0.850905  | 1.075948  | 3.770982  |
| C | 1.519977  | 2.096042  | 3.084078  |
| C | 0.787712  | 3.152199  | 2.423439  |
| C | 1.461533  | 3.477405  | 1.195602  |
| C | 0.735134  | 3.780564  | -0.000925 |
| C | 1.373312  | 3.475496  | -1.242790 |
| C | 0.604100  | 3.157460  | -2.420595 |
| C | -0.790141 | 3.181493  | -2.384441 |
| C | -1.521859 | 2.133310  | -3.058336 |
| C | -0.852023 | 1.122158  | -3.757712 |
| C | -1.303779 | -0.247475 | -3.637399 |
| C | -2.435849 | -0.614243 | -2.857341 |
| C | -2.426795 | -1.964916 | -2.243038 |
| C | -3.258193 | -2.215270 | -1.086564 |
| C | -2.697231 | -2.896870 | 0.074211  |
| C | -3.145869 | -2.210778 | 1.273200  |
| C | -2.233370 | -1.981598 | 2.372699  |
| C | -2.200100 | -0.646146 | 3.005441  |
| C | -1.038589 | -0.294556 | 3.752572  |
| C | -0.581542 | 1.071983  | 3.836507  |
| C | -1.296037 | 2.090002  | 3.183877  |
| C | -0.606599 | 3.126812  | 2.459273  |
| C | -1.376305 | 3.459410  | 1.285729  |
| C | -0.738085 | 3.779959  | 0.047622  |
| C | -1.463981 | 3.490717  | -1.152529 |

---

|    |           |           |           |
|----|-----------|-----------|-----------|
| C  | -2.650165 | 2.683524  | -1.104903 |
| C  | -2.672254 | 1.809219  | -2.275492 |
| C  | -3.191818 | 0.483409  | -2.207140 |
| C  | -4.007238 | 0.181293  | -1.049252 |
| C  | -4.122630 | -1.178348 | -0.585717 |
| C  | -4.052515 | -1.183823 | 0.858794  |
| C  | -3.885064 | 0.166320  | 1.314997  |
| C  | -2.996511 | 0.460537  | 2.420922  |
| C  | -2.507973 | 1.789733  | 2.489871  |
| C  | -2.588799 | 2.689829  | 1.333258  |
| C  | -3.208281 | 2.271683  | 0.132184  |
| C  | -3.913147 | 1.017550  | 0.141772  |
| Sc | -2.078793 | -0.541420 | -0.028967 |
| Sc | 2.080004  | -0.540683 | 0.026119  |

Sc<sub>2</sub>@C<sub>s</sub>(13336)-C<sub>74</sub>

76

|   |           |           |           |
|---|-----------|-----------|-----------|
| C | -4.018257 | 0.624943  | 0.841016  |
| C | -3.969560 | 1.178903  | -0.493109 |
| C | -4.214121 | -0.818978 | 0.757295  |
| C | -3.266663 | 1.253590  | 1.902056  |
| C | -4.165953 | 0.090151  | -1.406647 |
| C | -3.112318 | 2.284819  | -0.826443 |
| C | -4.343559 | -1.139312 | -0.668540 |
| C | -3.368311 | -1.662000 | 1.611201  |
| C | -2.650035 | 2.488895  | 1.622725  |
| C | -2.658011 | 0.394353  | 2.870688  |
| C | -3.249181 | -0.110260 | -2.487923 |
| C | -2.615062 | 3.038890  | 0.270835  |
| C | -2.327661 | 2.205935  | -2.071972 |
| C | -3.511523 | -2.142679 | -1.316333 |
| C | -2.676912 | -1.046975 | 2.686805  |
| C | -2.706837 | -2.782910 | 0.981389  |
| C | -1.420421 | 2.868660  | 2.289876  |
| C | -1.426934 | 0.756014  | 3.500199  |
| C | -2.340071 | 0.942880  | -2.844959 |
| C | -2.817334 | -1.506868 | -2.429182 |

|   |           |           |           |
|---|-----------|-----------|-----------|
| C | -1.419199 | 3.809952  | 0.149891  |
| C | -1.173971 | 3.028662  | -2.175187 |
| C | -2.734961 | -2.997425 | -0.471108 |
| C | -1.416387 | -1.562545 | 3.203794  |
| C | -1.421186 | -3.240834 | 1.454962  |
| C | -0.697825 | 3.731477  | 1.400723  |
| C | -0.738539 | 1.968434  | 3.157505  |
| C | -0.699960 | -0.461885 | 3.755171  |
| C | -1.162438 | 0.526615  | -3.508435 |
| C | -1.450760 | -1.859497 | -2.798547 |
| C | -0.719007 | 3.837077  | -1.063793 |
| C | -0.000271 | 2.594804  | -2.891986 |
| C | -1.429414 | -3.439252 | -0.876755 |
| C | -0.729558 | -2.635898 | 2.565345  |
| C | -0.697995 | -3.713915 | 0.323288  |
| C | 0.696892  | 3.731623  | 1.400729  |
| C | 0.737905  | 1.968591  | 3.157531  |
| C | 0.699770  | -0.461789 | 3.755201  |
| C | -0.715765 | -0.864687 | -3.484104 |
| C | -0.000204 | 1.352523  | -3.526349 |
| C | -0.729182 | -2.852397 | -2.005424 |
| C | 0.718136  | 3.837230  | -1.063761 |
| C | 1.173312  | 3.028858  | -2.175170 |
| C | 0.729860  | -2.635777 | 2.565341  |
| C | 0.698571  | -3.713769 | 0.323300  |
| C | 1.419651  | 2.868949  | 2.289915  |
| C | 1.418294  | 3.810328  | 0.149937  |
| C | 1.426532  | 0.756268  | 3.500213  |
| C | 1.416424  | -1.562250 | 3.203806  |
| C | 0.715834  | -0.864540 | -3.484068 |
| C | 1.162217  | 0.526791  | -3.508278 |
| C | 0.729647  | -2.852264 | -2.005430 |
| C | 2.327171  | 2.206391  | -2.071904 |
| C | 1.421663  | -3.240591 | 1.455021  |
| C | 1.429986  | -3.438992 | -0.876694 |
| C | 2.649335  | 2.489453  | 1.622807  |
| C | 2.614363  | 3.039515  | 0.270880  |

---

|    |           |           |           |
|----|-----------|-----------|-----------|
| C  | 2.657686  | 0.394897  | 2.870829  |
| C  | 2.676826  | -1.046479 | 2.686771  |
| C  | 1.451015  | -1.859332 | -2.798624 |
| C  | 2.339670  | 0.943276  | -2.844709 |
| C  | 3.111901  | 2.285685  | -0.826365 |
| C  | 2.707343  | -2.782582 | 0.981508  |
| C  | 2.735495  | -2.997039 | -0.471021 |
| C  | 3.266134  | 1.254245  | 1.902192  |
| C  | 3.368580  | -1.661504 | 1.611418  |
| C  | 2.817253  | -1.506373 | -2.429039 |
| C  | 3.249271  | -0.109708 | -2.488147 |
| C  | 3.969046  | 1.179681  | -0.492991 |
| C  | 3.511906  | -2.142345 | -1.316480 |
| C  | 4.017484  | 0.625656  | 0.841112  |
| C  | 4.214279  | -0.818225 | 0.757618  |
| C  | 4.165903  | 0.090887  | -1.406607 |
| C  | 4.344086  | -1.138754 | -0.668504 |
| Sc | -2.275457 | -0.620931 | -0.345261 |
| Sc | 2.277144  | -0.620575 | -0.345110 |

Sc<sub>2</sub>@C<sub>2</sub>(13290)-C<sub>74</sub>

76

|   |           |           |           |
|---|-----------|-----------|-----------|
| C | 0.082181  | 1.890690  | -3.207694 |
| C | 0.611002  | 0.635777  | -3.614661 |
| C | -0.206809 | -0.559031 | -3.574593 |
| C | 0.627530  | -1.649393 | -3.185341 |
| C | 0.132483  | -2.692173 | -2.353345 |
| C | 1.079849  | -3.310961 | -1.474507 |
| C | 0.677719  | -3.755057 | -0.163750 |
| C | 1.663224  | -3.389449 | 0.787742  |
| C | 1.295969  | -2.693783 | 1.998760  |
| C | 2.174560  | -1.649321 | 2.505748  |
| C | 1.581020  | -0.518886 | 3.226950  |
| C | 2.153928  | 0.793189  | 3.080587  |
| C | 1.327140  | 1.950608  | 2.968127  |
| C | 1.873140  | 2.793729  | 1.930466  |
| C | 1.004762  | 3.507446  | 1.047058  |

|   |           |           |           |
|---|-----------|-----------|-----------|
| C | 1.379635  | 3.583167  | -0.332662 |
| C | 0.387451  | 3.532538  | -1.361229 |
| C | 0.923203  | 2.766955  | -2.463410 |
| C | -1.327232 | 1.950589  | -2.968046 |
| C | -1.873270 | 2.793655  | -1.930373 |
| C | -1.004927 | 3.507407  | -1.046959 |
| C | -1.379805 | 3.583089  | 0.332759  |
| C | -0.387621 | 3.532494  | 1.361326  |
| C | -0.923335 | 2.766865  | 2.463495  |
| C | -0.082269 | 1.890625  | 3.207763  |
| C | -0.611031 | 0.635673  | 3.614693  |
| C | 0.206839  | -0.559092 | 3.574598  |
| C | -0.627447 | -1.649489 | 3.185329  |
| C | -0.132353 | -2.692228 | 2.353311  |
| C | -1.079684 | -3.311056 | 1.474466  |
| C | -0.677527 | -3.755100 | 0.163695  |
| C | -1.663048 | -3.389513 | -0.787788 |
| C | -1.295837 | -2.693813 | -1.998797 |
| C | -2.174476 | -1.649378 | -2.505766 |
| C | -1.580992 | -0.518904 | -3.226944 |
| C | -2.153975 | 0.793140  | -3.080550 |
| C | -3.306051 | 0.996054  | -2.231597 |
| C | -3.091932 | 2.202861  | -1.460371 |
| C | -3.460437 | 2.258949  | -0.058522 |
| C | -2.565618 | 2.919817  | 0.818930  |
| C | -2.268671 | 2.393754  | 2.139570  |
| C | -2.813981 | 1.150092  | 2.571221  |
| C | -1.962188 | 0.268418  | 3.309679  |
| C | -1.983194 | -1.157493 | 3.074043  |
| C | -2.906562 | -1.743412 | 2.173935  |
| C | -2.431298 | -2.837737 | 1.371998  |
| C | -2.805791 | -2.937976 | -0.024885 |
| C | -3.782626 | -2.112142 | -0.593727 |
| C | -3.481723 | -1.432219 | -1.853712 |
| C | -4.075762 | -0.096122 | -1.759060 |
| C | -4.653983 | 0.063057  | -0.423156 |
| C | -4.228974 | 1.146559  | 0.459174  |

---

|    |           |           |           |
|----|-----------|-----------|-----------|
| C  | -3.823675 | 0.546751  | 1.727992  |
| C  | -3.927829 | -0.893891 | 1.602181  |
| C  | -4.462817 | -1.178594 | 0.285388  |
| C  | 3.305959  | 0.996163  | 2.231604  |
| C  | 3.091813  | 2.202995  | 1.460437  |
| C  | 3.460301  | 2.259104  | 0.058597  |
| C  | 2.565481  | 2.919968  | -0.818850 |
| C  | 2.268563  | 2.393909  | -2.139496 |
| C  | 2.813930  | 1.150282  | -2.571175 |
| C  | 1.962173  | 0.268585  | -3.309650 |
| C  | 1.983251  | -1.157330 | -3.074041 |
| C  | 2.906663  | -1.743221 | -2.173955 |
| C  | 2.431439  | -2.837577 | -1.372030 |
| C  | 2.805946  | -2.937829 | 0.024850  |
| C  | 3.782801  | -2.112012 | 0.593717  |
| C  | 3.481806  | -1.432103 | 1.853698  |
| C  | 4.075701  | -0.095953 | 1.759028  |
| C  | 4.653939  | 0.063264  | 0.423161  |
| C  | 4.228863  | 1.146746  | -0.459124 |
| C  | 3.823660  | 0.546959  | -1.727974 |
| C  | 3.927933  | -0.893687 | -1.602214 |
| C  | 4.462940  | -1.178404 | -0.285405 |
| Sc | -2.509519 | -0.226667 | -0.213191 |
| Sc | 2.509506  | -0.226932 | 0.212986  |

Sc<sub>2</sub>@C<sub>2</sub>(13291)-C<sub>74</sub>

76

|   |           |           |           |
|---|-----------|-----------|-----------|
| C | -4.565901 | -0.912819 | 0.005879  |
| C | -3.998343 | -1.126959 | -1.317157 |
| C | -3.758027 | 0.183122  | -1.901549 |
| C | -4.115803 | 1.193734  | -0.926092 |
| C | -4.638751 | 0.508948  | 0.247559  |
| C | -4.077447 | 0.771006  | 1.566960  |
| C | -3.602949 | -0.492061 | 2.132998  |
| C | -3.966498 | -1.539981 | 1.173827  |
| C | -3.043286 | -2.576061 | 0.925826  |
| C | -2.678926 | -3.001009 | -0.416273 |

|   |           |           |           |
|---|-----------|-----------|-----------|
| C | -3.053099 | -2.193969 | -1.552834 |
| C | -2.077999 | -2.010584 | -2.577065 |
| C | -1.895867 | -0.731122 | -3.224680 |
| C | -2.674547 | 0.397751  | -2.845026 |
| C | -2.039200 | 1.666176  | -2.834496 |
| C | -2.327442 | 2.638794  | -1.795716 |
| C | -3.273226 | 2.366971  | -0.783369 |
| C | -2.925221 | 2.759267  | 0.562225  |
| C | -3.235008 | 1.898163  | 1.680492  |
| C | -2.112395 | 1.916613  | 2.599457  |
| C | -1.595566 | 0.686501  | 3.137215  |
| C | -2.311997 | -0.559871 | 2.845705  |
| C | -1.544315 | -1.799015 | 2.754018  |
| C | -1.926435 | -2.808516 | 1.797690  |
| C | -0.947671 | -3.534176 | 1.053083  |
| C | -1.389429 | -3.605128 | -0.326458 |
| C | -0.438885 | -3.462512 | -1.383335 |
| C | -0.796085 | -2.652048 | -2.500959 |
| C | 0.174414  | -1.796868 | -3.136748 |
| C | -0.492799 | -0.594922 | -3.534549 |
| C | 0.170682  | 0.660609  | -3.483469 |
| C | -0.649024 | 1.803159  | -3.193495 |
| C | -0.125230 | 2.903560  | -2.448535 |
| C | -1.098318 | 3.353735  | -1.510986 |
| C | -0.715140 | 3.686059  | -0.171926 |
| C | -1.670113 | 3.404634  | 0.853820  |
| C | -1.237988 | 2.944827  | 2.147681  |
| C | 0.127214  | 2.901169  | 2.451374  |
| C | 0.650166  | 1.799610  | 3.195300  |
| C | -0.170375 | 0.657372  | 3.484207  |
| C | 0.492240  | -0.598650 | 3.534094  |
| C | -0.175915 | -1.799756 | 3.135199  |
| C | 0.793997  | -2.655113 | 2.498630  |
| C | 0.436213  | -3.464180 | 1.380185  |
| C | 1.386618  | -3.606691 | 0.323204  |
| C | 0.944877  | -3.534056 | -1.056320 |
| C | 1.924093  | -2.808109 | -1.800106 |



---

|    |           |           |           |
|----|-----------|-----------|-----------|
| C  | 1.542846  | -1.797505 | -2.755467 |
| C  | 2.311242  | -0.558760 | -2.845786 |
| C  | 1.595808  | 0.688295  | -3.136407 |
| C  | 2.113698  | 1.917463  | -2.597437 |
| C  | 1.240005  | 2.945813  | -2.144683 |
| C  | 1.672646  | 3.404325  | -0.850571 |
| C  | 0.717692  | 3.685310  | 0.175359  |
| C  | 1.100517  | 3.351207  | 1.514018  |
| C  | 2.328978  | 2.634838  | 1.797792  |
| C  | 2.040053  | 1.661706  | 2.835845  |
| C  | 2.674683  | 0.392917  | 2.845421  |
| C  | 1.895237  | -0.735721 | 3.224156  |
| C  | 2.076390  | -2.014729 | 2.575398  |
| C  | 3.051086  | -2.197695 | 1.550706  |
| C  | 2.676489  | -3.003518 | 0.413615  |
| C  | 3.040895  | -2.577167 | -0.927948 |
| C  | 3.964441  | -1.541327 | -1.174817 |
| C  | 3.602407  | -0.492387 | -2.133266 |
| C  | 4.078882  | 0.769883  | -1.566598 |
| C  | 3.236452  | 1.897462  | -1.678725 |
| C  | 2.927610  | 2.758233  | -0.559773 |
| C  | 3.275054  | 2.363821  | 0.785474  |
| C  | 4.117543  | 1.190298  | 0.927683  |
| C  | 3.758030  | 0.178690  | 1.901866  |
| C  | 3.996839  | -1.130924 | 1.315999  |
| C  | 4.564839  | -0.915881 | -0.006610 |
| C  | 4.640105  | 0.506120  | -0.247002 |
| Sc | -2.533075 | -0.090113 | 0.204426  |
| Sc | 2.534287  | -0.086563 | -0.205491 |

Sc<sub>2</sub>@C<sub>2</sub>(13292)-C<sub>74</sub>

76

|   |           |           |           |
|---|-----------|-----------|-----------|
| C | -4.387175 | 0.555715  | -1.332970 |
| C | -3.945620 | 1.716309  | -0.583307 |
| C | -3.945214 | 1.355639  | 0.821452  |
| C | -4.323104 | -0.044040 | 0.940117  |
| C | -4.624533 | -0.527122 | -0.404930 |

---

|   |           |           |           |
|---|-----------|-----------|-----------|
| C | -3.969330 | -1.717476 | -0.934836 |
| C | -3.280695 | -1.354735 | -2.177701 |
| C | -3.589446 | 0.050065  | -2.435293 |
| C | -2.560611 | 0.895923  | -2.918675 |
| C | -2.265097 | 2.180879  | -2.326855 |
| C | -2.896893 | 2.583128  | -1.095032 |
| C | -2.106314 | 3.290806  | -0.165920 |
| C | -2.182654 | 3.016622  | 1.255875  |
| C | -3.018229 | 1.978503  | 1.750131  |
| C | -2.517203 | 1.169513  | 2.809382  |
| C | -2.779423 | -0.253437 | 2.846570  |
| C | -3.588725 | -0.880350 | 1.868497  |
| C | -3.148680 | -2.171870 | 1.391315  |
| C | -3.257552 | -2.514225 | -0.012161 |
| C | -2.071311 | -3.252278 | -0.401627 |
| C | -1.370770 | -2.904002 | -1.608691 |
| C | -1.947296 | -1.885258 | -2.484706 |
| C | -1.042905 | -1.037416 | -3.261232 |
| C | -1.348579 | 0.349805  | -3.447048 |
| C | -0.331453 | 1.364825  | -3.339834 |
| C | -0.877306 | 2.458583  | -2.588027 |
| C | -0.074657 | 3.171417  | -1.653648 |
| C | -0.732013 | 3.644157  | -0.472790 |
| C | -0.031627 | 3.720631  | 0.764395  |
| C | -0.870140 | 3.241070  | 1.818119  |
| C | -0.331444 | 2.399040  | 2.843019  |
| C | -1.203751 | 1.395088  | 3.365729  |
| C | -0.691077 | 0.122869  | 3.779545  |
| C | -1.598292 | -0.904039 | 3.385795  |
| C | -1.118411 | -2.147285 | 2.866478  |
| C | -1.946280 | -2.789096 | 1.888006  |
| C | -1.353211 | -3.518180 | 0.800160  |
| C | 0.031713  | -3.719303 | 0.770783  |
| C | 0.731939  | -3.644934 | -0.466583 |
| C | 0.074485  | -3.174249 | -1.648207 |
| C | 0.877006  | -2.463090 | -2.583949 |
| C | 0.331060  | -1.370661 | -3.337618 |

---

|    |           |           |           |
|----|-----------|-----------|-----------|
| C  | 1.348185  | -0.355759 | -3.446562 |
| C  | 1.042543  | 1.031756  | -3.263045 |
| C  | 1.947001  | 1.881022  | -2.488224 |
| C  | 1.370607  | 2.901270  | -1.613865 |
| C  | 2.071296  | 3.251595  | -0.407444 |
| C  | 1.353281  | 3.519530  | 0.793949  |
| C  | 1.946480  | 2.792420  | 1.883036  |
| C  | 1.118710  | 2.152242  | 2.862669  |
| C  | 1.598643  | 0.909864  | 3.384023  |
| C  | 0.691451  | -0.116345 | 3.779644  |
| C  | 1.204068  | -1.389285 | 3.367958  |
| C  | 0.331724  | -2.394127 | 2.847048  |
| C  | 0.870355  | -3.238012 | 1.823622  |
| C  | 2.182832  | -3.014543 | 1.260856  |
| C  | 2.106317  | -3.291081 | -0.160449 |
| C  | 2.896748  | -2.584971 | -1.090897 |
| C  | 2.264820  | -2.184951 | -2.323354 |
| C  | 2.560238  | -0.900995 | -2.917351 |
| C  | 3.589048  | -0.054276 | -2.435469 |
| C  | 3.280296  | 1.350899  | -2.180220 |
| C  | 3.969199  | 1.715862  | -0.938179 |
| C  | 3.257571  | 2.514296  | -0.016824 |
| C  | 3.148887  | 2.174326  | 1.387295  |
| C  | 3.588957  | 0.883616  | 1.866576  |
| C  | 2.779686  | 0.258351  | 2.845782  |
| C  | 2.517428  | -1.164646 | 2.811023  |
| C  | 3.018459  | -1.975544 | 1.753258  |
| C  | 3.945345  | -1.354242 | 0.823416  |
| C  | 3.945549  | -1.717304 | -0.580739 |
| C  | 4.386890  | -0.557987 | -1.332398 |
| C  | 4.624476  | 0.526433  | -0.406291 |
| C  | 4.323316  | 0.045676  | 0.939621  |
| Sc | 2.486678  | 0.123909  | -0.444447 |
| Sc | -2.486561 | -0.124661 | -0.444750 |

La<sub>2</sub>@C<sub>74</sub> series:

La<sub>2</sub>@C<sub>2</sub>(13333)-C<sub>74</sub>

76

|   |           |           |           |
|---|-----------|-----------|-----------|
| C | 4.546431  | -0.072688 | 0.133288  |
| C | 4.141873  | -0.969848 | -0.959022 |
| C | 3.553895  | -2.158990 | -0.323064 |
| C | 3.523650  | -1.935188 | 1.123974  |
| C | 4.143576  | -0.669516 | 1.376344  |
| C | 3.538583  | 0.325038  | 2.220391  |
| C | 3.580166  | 1.596693  | 1.469898  |
| C | 4.213388  | 1.333713  | 0.181692  |
| C | 3.617832  | 1.890635  | -1.005186 |
| C | 3.327959  | 1.049327  | -2.174517 |
| C | 3.531123  | -0.402395 | -2.157775 |
| C | 2.514399  | -1.193825 | -2.796556 |
| C | 2.042765  | -2.449239 | -2.236540 |
| C | 2.486767  | -2.901942 | -0.951628 |
| C | 1.539133  | -3.557213 | -0.106779 |
| C | 1.506563  | -3.277439 | 1.320018  |
| C | 2.401549  | -2.344659 | 1.929361  |
| C | 1.875454  | -1.415067 | 2.949549  |
| C | 2.414826  | -0.033284 | 3.034845  |
| C | 1.538600  | 1.036373  | 3.403480  |
| C | 1.571326  | 2.301908  | 2.662906  |
| C | 2.491014  | 2.545026  | 1.605266  |
| C | 2.004605  | 3.246185  | 0.397949  |
| C | 2.563048  | 2.866406  | -0.881873 |
| C | 1.709644  | 2.742999  | -2.042067 |
| C | 2.148027  | 1.612655  | -2.808049 |
| C | 1.181780  | 0.801846  | -3.498544 |
| C | 1.401789  | -0.608088 | -3.512392 |
| C | 0.291924  | -1.520506 | -3.465428 |
| C | 0.681539  | -2.638869 | -2.650107 |
| C | -0.263317 | -3.291894 | -1.794817 |
| C | 0.184097  | -3.781890 | -0.537326 |
| C | -0.683210 | -3.692192 | 0.622313  |
| C | 0.149898  | -3.398925 | 1.753575  |
| C | -0.326107 | -2.617099 | 2.811352  |
| C | 0.534861  | -1.621454 | 3.390428  |

---

|   |           |           |           |
|---|-----------|-----------|-----------|
| C | -0.311956 | -0.512539 | 3.769028  |
| C | 0.181343  | 0.795112  | 3.758401  |
| C | -0.656373 | 1.856876  | 3.241723  |
| C | 0.223417  | 2.796594  | 2.604562  |
| C | -0.211265 | 3.540520  | 1.503087  |
| C | 0.669969  | 3.740518  | 0.386931  |
| C | -0.152641 | 3.701059  | -0.804787 |
| C | 0.335896  | 3.146355  | -2.017908 |
| C | -0.584722 | 2.449317  | -2.863068 |
| C | -0.167487 | 1.270422  | -3.573362 |
| C | -1.275723 | 0.354869  | -3.602463 |
| C | -1.059626 | -1.051102 | -3.489251 |
| C | -2.036915 | -1.800728 | -2.754135 |
| C | -1.629451 | -2.878084 | -1.892195 |
| C | -2.529347 | -2.923685 | -0.766139 |
| C | -2.019897 | -3.205376 | 0.555353  |
| C | -2.553497 | -2.430743 | 1.699690  |
| C | -1.675685 | -2.121229 | 2.774794  |
| C | -1.655036 | -0.782434 | 3.378307  |
| C | -2.532975 | 0.255708  | 2.933824  |
| C | -1.984804 | 1.628917  | 2.774696  |
| C | -2.469527 | 2.489963  | 1.674483  |
| C | -1.553278 | 3.386296  | 1.036399  |
| C | -1.525593 | 3.522179  | -0.409956 |
| C | -2.443395 | 2.820178  | -1.245596 |
| C | -1.958353 | 2.288714  | -2.484823 |
| C | -2.406215 | 0.991477  | -2.963892 |
| C | -3.428600 | 0.248058  | -2.290169 |
| C | -3.231777 | -1.195168 | -2.204871 |
| C | -3.576277 | -1.958271 | -0.999610 |
| C | -4.193004 | -1.308512 | 0.114790  |
| C | -3.639929 | -1.489624 | 1.456608  |
| C | -3.644072 | -0.163184 | 2.120627  |
| C | -4.207052 | 0.773024  | 1.181993  |
| C | -3.561077 | 2.019477  | 0.859517  |
| C | -3.532712 | 2.128399  | -0.598700 |
| C | -4.105358 | 0.905496  | -1.170706 |

---

|    |           |           |           |
|----|-----------|-----------|-----------|
| C  | -4.541480 | 0.095556  | -0.043460 |
| La | 1.963511  | 0.027718  | -0.047519 |
| La | -1.967193 | -0.046770 | 0.033342  |

La<sub>2</sub>@C<sub>2</sub>(13333)-C<sub>74</sub>-triplet

76

|   |           |           |           |
|---|-----------|-----------|-----------|
| C | 4.569852  | 0.022141  | -0.043578 |
| C | 4.148609  | 0.881744  | 1.059110  |
| C | 3.586780  | 2.098121  | 0.453373  |
| C | 3.584919  | 1.922828  | -1.000004 |
| C | 4.207292  | 0.658690  | -1.279687 |
| C | 3.588911  | -0.302601 | -2.158804 |
| C | 3.585221  | -1.595803 | -1.452184 |
| C | 4.183684  | -1.371485 | -0.135957 |
| C | 3.563232  | -1.962882 | 1.006572  |
| C | 3.261755  | -1.158749 | 2.192433  |
| C | 3.486166  | 0.282847  | 2.214083  |
| C | 2.476104  | 1.069823  | 2.872149  |
| C | 2.038666  | 2.350999  | 2.351680  |
| C | 2.514450  | 2.830787  | 1.087187  |
| C | 1.590534  | 3.518784  | 0.244520  |
| C | 1.585681  | 3.302853  | -1.190351 |
| C | 2.481655  | 2.376237  | -1.813399 |
| C | 1.959599  | 1.485839  | -2.869771 |
| C | 2.480125  | 0.099659  | -2.980112 |
| C | 1.584385  | -0.944257 | -3.373163 |
| C | 1.590406  | -2.241083 | -2.706951 |
| C | 2.485821  | -2.524348 | -1.636251 |
| C | 1.963787  | -3.254731 | -0.461983 |
| C | 2.500982  | -2.928396 | 0.834768  |
| C | 1.629731  | -2.832662 | 1.980662  |
| C | 2.069266  | -1.728396 | 2.791902  |
| C | 1.108688  | -0.930956 | 3.492927  |
| C | 1.348086  | 0.476772  | 3.551841  |
| C | 0.252705  | 1.406985  | 3.512992  |
| C | 0.671859  | 2.547668  | 2.748260  |
| C | -0.253676 | 3.233410  | 1.898172  |

|   |           |           |           |
|---|-----------|-----------|-----------|
| C | 0.224716  | 3.737622  | 0.655961  |
| C | -0.618417 | 3.722942  | -0.516834 |
| C | 0.236170  | 3.460317  | -1.641914 |
| C | -0.230427 | 2.699722  | -2.715346 |
| C | 0.626708  | 1.719540  | -3.323013 |
| C | -0.233164 | 0.642905  | -3.758343 |
| C | 0.231266  | -0.668826 | -3.753940 |
| C | -0.628446 | -1.742290 | -3.310182 |
| C | 0.229010  | -2.718111 | -2.696002 |
| C | -0.237082 | -3.471342 | -1.617149 |
| C | 0.618053  | -3.725894 | -0.490526 |
| C | -0.224445 | -3.732312 | 0.682890  |
| C | 0.254294  | -3.218843 | 1.921038  |
| C | -0.670771 | -2.527024 | 2.766828  |
| C | -0.251155 | -1.380630 | 3.523075  |
| C | -1.346524 | -0.450280 | 3.555691  |
| C | -1.107258 | 0.957221  | 3.486669  |
| C | -2.068201 | 1.749595  | 2.780586  |
| C | -1.629107 | 2.848236  | 1.961346  |
| C | -2.500803 | 2.935436  | 0.815163  |
| C | -1.964193 | 3.252145  | -0.484220 |
| C | -2.486714 | 2.513421  | -1.652868 |
| C | -1.591793 | 2.222570  | -2.722053 |
| C | -1.586200 | 0.921018  | -3.378850 |
| C | -2.481660 | -0.119986 | -2.978083 |
| C | -1.961118 | -1.505496 | -2.858083 |
| C | -2.482890 | -2.388425 | -1.795244 |
| C | -1.586304 | -3.310408 | -1.165920 |
| C | -1.590524 | -3.516002 | 0.270521  |
| C | -2.514020 | -2.822029 | 1.108779  |
| C | -2.037600 | -2.333224 | 2.369581  |
| C | -2.474788 | -1.048089 | 2.880850  |
| C | -3.484892 | -0.265644 | 2.217613  |
| C | -3.260711 | 1.175457  | 2.185652  |
| C | -3.562596 | 1.970926  | 0.993970  |
| C | -4.183444 | 1.371394  | -0.143671 |
| C | -3.585865 | 1.586168  | -1.461776 |

---

|    |           |           |           |
|----|-----------|-----------|-----------|
| C  | -3.590310 | 0.288070  | -2.159112 |
| C  | -4.208393 | -0.666954 | -1.273007 |
| C  | -3.585912 | -1.929461 | -0.984569 |
| C  | -3.586885 | -2.094121 | 0.470129  |
| C  | -4.148033 | -0.872888 | 1.067162  |
| C  | -4.569884 | -0.021523 | -0.041105 |
| La | 1.923343  | -0.017813 | 0.001734  |
| La | -1.922814 | 0.014156  | 0.000147  |

La<sub>2</sub>@C<sub>2</sub>(13295)-C<sub>74</sub>

76

|   |          |           |           |
|---|----------|-----------|-----------|
| C | 4.313913 | -0.759693 | -1.278891 |
| C | 4.068695 | -1.648677 | -0.155253 |
| C | 4.130385 | -0.825201 | 1.064729  |
| C | 4.368505 | 0.578535  | 0.665264  |
| C | 4.493916 | 0.579120  | -0.794980 |
| C | 3.742786 | 1.478793  | -1.659238 |
| C | 3.032756 | 0.677347  | -2.661668 |
| C | 3.437653 | -0.710358 | -2.434118 |
| C | 2.486763 | -1.732385 | -2.568688 |
| C | 2.367486 | -2.784233 | -1.575622 |
| C | 3.078715 | -2.693999 | -0.306524 |
| C | 2.349452 | -3.074864 | 0.861874  |
| C | 2.443264 | -2.314939 | 2.093668  |
| C | 3.246324 | -1.130581 | 2.180258  |
| C | 2.701016 | -0.029487 | 2.920337  |
| C | 2.860088 | 1.341070  | 2.461522  |
| C | 3.625605 | 1.665383  | 1.295923  |
| C | 3.060529 | 2.696497  | 0.425847  |
| C | 3.066554 | 2.547677  | -1.024283 |
| C | 1.808299 | 3.007386  | -1.544120 |
| C | 1.106619 | 2.260422  | -2.561398 |
| C | 1.654084 | 0.995131  | -3.046271 |
| C | 0.726417 | -0.109104 | -3.333240 |
| C | 1.180552 | -1.456806 | -3.124301 |
| C | 0.296356 | -2.462050 | -2.630667 |
| C | 1.011447 | -3.243082 | -1.632801 |



---

|   |           |           |           |
|---|-----------|-----------|-----------|
| C | 0.333982  | -3.707932 | -0.468967 |
| C | 1.021317  | -3.622123 | 0.781759  |
| C | 0.307614  | -3.256220 | 1.974239  |
| C | 1.168141  | -2.413847 | 2.760539  |
| C | 0.630821  | -1.313722 | 3.493879  |
| C | 1.418978  | -0.124666 | 3.569691  |
| C | 0.793816  | 1.170617  | 3.536258  |
| C | 1.657621  | 2.060964  | 2.818459  |
| C | 1.111082  | 3.070695  | 1.965022  |
| C | 1.821604  | 3.361194  | 0.757366  |
| C | 1.089366  | 3.615489  | -0.458030 |
| C | -0.333981 | 3.707940  | -0.468972 |
| C | -1.011442 | 3.243090  | -1.632807 |
| C | -0.296348 | 2.462058  | -2.630671 |
| C | -1.180543 | 1.456813  | -3.124307 |
| C | -0.726407 | 0.109112  | -3.333242 |
| C | -1.654075 | -0.995123 | -3.046275 |
| C | -1.106612 | -2.260414 | -2.561399 |
| C | -1.808295 | -3.007378 | -1.544122 |
| C | -1.089365 | -3.615478 | -0.458030 |
| C | -1.821607 | -3.361183 | 0.757364  |
| C | -1.111087 | -3.070685 | 1.965022  |
| C | -1.657630 | -2.060954 | 2.818457  |
| C | -0.793826 | -1.170606 | 3.536257  |
| C | -1.418989 | 0.124677  | 3.569688  |
| C | -0.630831 | 1.313733  | 3.493876  |
| C | -1.168148 | 2.413857  | 2.760533  |
| C | -0.307620 | 3.256229  | 1.974235  |
| C | -1.021320 | 3.622131  | 0.781752  |
| C | -2.349454 | 3.074873  | 0.861864  |
| C | -3.078711 | 2.694004  | -0.306535 |
| C | -2.367481 | 2.784240  | -1.575631 |
| C | -2.486755 | 1.732391  | -2.568696 |
| C | -3.437643 | 0.710364  | -2.434126 |
| C | -3.032748 | -0.677341 | -2.661675 |
| C | -3.742784 | -1.478787 | -1.659250 |
| C | -3.066553 | -2.547671 | -1.024290 |

---

|    |           |           |           |
|----|-----------|-----------|-----------|
| C  | -3.060532 | -2.696489 | 0.425841  |
| C  | -3.625614 | -1.665376 | 1.295918  |
| C  | -2.860096 | -1.341060 | 2.461516  |
| C  | -2.701024 | 0.029498  | 2.920330  |
| C  | -3.246329 | 1.130591  | 2.180247  |
| C  | -2.443270 | 2.314949  | 2.093659  |
| C  | -4.130387 | 0.825210  | 1.064715  |
| C  | -4.068689 | 1.648681  | -0.155266 |
| C  | -4.313907 | 0.759698  | -1.278903 |
| C  | -4.493916 | -0.579112 | -0.794993 |
| C  | -4.368512 | -0.578528 | 0.665254  |
| La | 2.048955  | 0.060152  | -0.249210 |
| La | -2.048954 | -0.060184 | -0.249201 |

La<sub>2</sub>@C<sub>2</sub>(13295)-C<sub>74</sub>-triplet

76

|   |          |           |           |
|---|----------|-----------|-----------|
| C | 4.335845 | -0.716916 | -1.292132 |
| C | 4.077939 | -1.600421 | -0.177916 |
| C | 4.132897 | -0.784431 | 1.045273  |
| C | 4.357527 | 0.615584  | 0.641383  |
| C | 4.508680 | 0.617745  | -0.807271 |
| C | 3.725998 | 1.502933  | -1.649229 |
| C | 3.019661 | 0.697952  | -2.663078 |
| C | 3.440383 | -0.674879 | -2.439317 |
| C | 2.501307 | -1.706560 | -2.581449 |
| C | 2.387568 | -2.763524 | -1.592668 |
| C | 3.089356 | -2.661395 | -0.329223 |
| C | 2.366157 | -3.053385 | 0.842543  |
| C | 2.453226 | -2.291714 | 2.073148  |
| C | 3.248239 | -1.096748 | 2.157587  |
| C | 2.695850 | -0.006239 | 2.904414  |
| C | 2.841558 | 1.365943  | 2.445267  |
| C | 3.605279 | 1.692606  | 1.272772  |
| C | 3.036808 | 2.721781  | 0.419051  |
| C | 3.047302 | 2.567001  | -1.034426 |
| C | 1.789396 | 3.023554  | -1.557230 |
| C | 1.094030 | 2.273899  | -2.570889 |

|   |           |           |           |
|---|-----------|-----------|-----------|
| C | 1.651990  | 1.007394  | -3.049637 |
| C | 0.727523  | -0.101919 | -3.343953 |
| C | 1.191217  | -1.436160 | -3.123582 |
| C | 0.308040  | -2.458436 | -2.632256 |
| C | 1.027565  | -3.234074 | -1.647510 |
| C | 0.356792  | -3.711687 | -0.482829 |
| C | 1.044592  | -3.617208 | 0.768314  |
| C | 0.330939  | -3.263164 | 1.963868  |
| C | 1.183141  | -2.403913 | 2.741703  |
| C | 0.636535  | -1.307077 | 3.482048  |
| C | 1.415974  | -0.112712 | 3.558294  |
| C | 0.783915  | 1.177106  | 3.529097  |
| C | 1.643329  | 2.077725  | 2.806754  |
| C | 1.090054  | 3.087412  | 1.956049  |
| C | 1.801578  | 3.381954  | 0.751906  |
| C | 1.064520  | 3.622440  | -0.470871 |
| C | -0.356791 | 3.711687  | -0.482834 |
| C | -1.027561 | 3.234074  | -1.647515 |
| C | -0.308033 | 2.458433  | -2.632259 |
| C | -1.191209 | 1.436158  | -3.123587 |
| C | -0.727514 | 0.101917  | -3.343956 |
| C | -1.651983 | -1.007397 | -3.049642 |
| C | -1.094024 | -2.273902 | -2.570890 |
| C | -1.789393 | -3.023556 | -1.557233 |
| C | -1.064518 | -3.622441 | -0.470870 |
| C | -1.801580 | -3.381954 | 0.751904  |
| C | -1.090058 | -3.087410 | 1.956048  |
| C | -1.643336 | -2.077722 | 2.806751  |
| C | -0.783925 | -1.177103 | 3.529095  |
| C | -1.415983 | 0.112714  | 3.558289  |
| C | -0.636544 | 1.307080  | 3.482045  |
| C | -1.183148 | 2.403915  | 2.741698  |
| C | -0.330944 | 3.263166  | 1.963865  |
| C | -1.044594 | 3.617209  | 0.768307  |
| C | -2.366159 | 3.053385  | 0.842533  |
| C | -3.089355 | 2.661395  | -0.329235 |
| C | -2.387563 | 2.763523  | -1.592677 |

---

|    |           |           |           |
|----|-----------|-----------|-----------|
| C  | -2.501300 | 1.706558  | -2.581458 |
| C  | -3.440378 | 0.674878  | -2.439328 |
| C  | -3.019655 | -0.697954 | -2.663087 |
| C  | -3.725994 | -1.502935 | -1.649239 |
| C  | -3.047300 | -2.567002 | -1.034433 |
| C  | -3.036809 | -2.721781 | 0.419044  |
| C  | -3.605281 | -1.692605 | 1.272763  |
| C  | -2.841564 | -1.365941 | 2.445260  |
| C  | -2.695858 | 0.006241  | 2.904406  |
| C  | -3.248244 | 1.096750  | 2.157576  |
| C  | -2.453232 | 2.291716  | 2.073139  |
| C  | -4.132899 | 0.784432  | 1.045259  |
| C  | -4.077938 | 1.600421  | -0.177929 |
| C  | -4.335841 | 0.716915  | -1.292146 |
| C  | -4.508678 | -0.617746 | -0.807283 |
| C  | -4.357528 | -0.615583 | 0.641371  |
| La | 1.945426  | 0.007405  | -0.201457 |
| La | -1.945425 | -0.007405 | -0.201465 |

La<sub>2</sub>@D<sub>3h</sub>(14246)-C<sub>74</sub>

76

|   |           |           |           |
|---|-----------|-----------|-----------|
| C | 3.087427  | -2.646806 | 0.705538  |
| C | 2.608535  | -3.042591 | -0.606965 |
| C | 1.286389  | -3.587445 | -0.455613 |
| C | 0.958616  | -3.598449 | 0.972713  |
| C | 2.063375  | -3.004123 | 1.666672  |
| C | 1.812336  | -2.167113 | 2.787054  |
| C | 2.535702  | -0.950606 | 2.962309  |
| C | 3.504422  | -0.549163 | 1.985862  |
| C | 3.846480  | -1.419213 | 0.871647  |
| C | 4.172358  | -0.557564 | -0.284785 |
| C | 3.696683  | -0.975644 | -1.617193 |
| C | 2.896674  | -2.190161 | -1.738733 |
| C | 1.845847  | -1.957508 | -2.698997 |
| C | 0.542134  | -2.587697 | -2.612637 |
| C | 0.256730  | -3.432501 | -1.441304 |
| C | -1.097549 | -3.547256 | -0.994705 |

---

|   |           |           |           |
|---|-----------|-----------|-----------|
| C | -1.425568 | -3.536202 | 0.432667  |
| C | -0.388810 | -3.431345 | 1.420370  |
| C | -0.642920 | -2.585969 | 2.599260  |
| C | 0.456732  | -1.968574 | 3.250615  |
| C | 0.366818  | -0.613201 | 3.756612  |
| C | 1.628991  | 0.031645  | 3.504748  |
| C | 1.690992  | 1.411151  | 3.129330  |
| C | 2.682707  | 1.823677  | 2.112642  |
| C | 3.567556  | 0.817955  | 1.551058  |
| C | 3.961657  | 0.830982  | 0.134521  |
| C | 3.404972  | 1.860180  | -0.753717 |
| C | 2.947948  | 1.443413  | -2.104300 |
| C | 3.066657  | 0.032341  | -2.470390 |
| C | 1.984652  | -0.608914 | -3.184268 |
| C | 0.849850  | 0.116640  | -3.678051 |
| C | -0.390449 | -0.571704 | -3.757717 |
| C | -0.532726 | -1.925579 | -3.261594 |
| C | -1.896680 | -2.076022 | -2.803235 |
| C | -2.179293 | -2.908552 | -1.685171 |
| C | -3.193707 | -2.524800 | -0.723114 |
| C | -2.729088 | -2.947738 | 0.589277  |
| C | -2.985786 | -2.094953 | 1.731966  |
| C | -1.923584 | -1.908176 | 2.691326  |
| C | -2.007726 | -0.556537 | 3.182936  |
| C | -0.846018 | 0.122388  | 3.680555  |
| C | -0.782235 | 1.521672  | 3.504103  |
| C | 0.483521  | 2.166911  | 3.251586  |
| C | 0.239983  | 3.315224  | 2.424443  |
| C | 1.198650  | 3.703039  | 1.469950  |
| C | 2.409937  | 2.952332  | 1.309961  |
| C | 2.754557  | 2.955674  | -0.131486 |
| C | 1.729172  | 3.704848  | -0.801776 |
| C | 1.286923  | 3.311312  | -2.072124 |
| C | 1.884451  | 2.165535  | -2.712745 |
| C | 0.839813  | 1.516206  | -3.491947 |
| C | -0.400821 | 2.207100  | -3.235552 |
| C | -1.636340 | 1.496624  | -3.117969 |

---

|    |           |           |           |
|----|-----------|-----------|-----------|
| C  | -1.628461 | 0.118709  | -3.503488 |
| C  | -2.573033 | -0.832927 | -2.971154 |
| C  | -3.526749 | -0.402507 | -1.989533 |
| C  | -3.906351 | -1.266768 | -0.882550 |
| C  | -4.190835 | -0.399445 | 0.282743  |
| C  | -3.731522 | -0.844955 | 1.613410  |
| C  | -3.060653 | 0.130602  | 2.470494  |
| C  | -2.887235 | 1.537735  | 2.114052  |
| C  | -1.800563 | 2.216014  | 2.729863  |
| C  | -1.160563 | 3.342984  | 2.097089  |
| C  | -1.587984 | 3.762225  | 0.829802  |
| C  | -0.605695 | 4.189629  | -0.143029 |
| C  | 0.764694  | 4.162988  | 0.174512  |
| C  | -1.056200 | 3.754818  | -1.441340 |
| C  | -0.113734 | 3.338899  | -2.399802 |
| C  | -2.295473 | 3.049376  | -1.285951 |
| C  | -2.610873 | 1.938067  | -2.097218 |
| C  | -3.531124 | 0.961868  | -1.542325 |
| C  | -3.920071 | 0.978870  | -0.126245 |
| C  | -3.326305 | 1.979305  | 0.767552  |
| C  | -2.640793 | 3.057899  | 0.154191  |
| La | -1.749740 | -0.407388 | 0.156628  |
| La | 1.739063  | -0.414521 | -0.166597 |

La<sub>2</sub>@C<sub>1</sub>(13408)-C<sub>74</sub>

76

|   |          |           |           |
|---|----------|-----------|-----------|
| C | 4.146567 | 0.805586  | 1.014744  |
| C | 3.241801 | 1.118456  | 2.126730  |
| C | 4.392254 | -0.591387 | 0.635203  |
| C | 4.096755 | 1.599357  | -0.235676 |
| C | 2.632613 | 0.007669  | 2.886545  |
| C | 2.496727 | 2.335696  | 2.015233  |
| C | 4.471206 | -0.661007 | -0.816720 |
| C | 3.684566 | -1.641038 | 1.292902  |
| C | 4.310309 | 0.668645  | -1.334124 |
| C | 3.109849 | 2.641682  | -0.410699 |
| C | 2.863343 | -1.351710 | 2.439141  |

---

|   |           |           |           |
|---|-----------|-----------|-----------|
| C | 1.395633  | 0.233254  | 3.564482  |
| C | 2.401574  | 3.073557  | 0.755580  |
| C | 1.246852  | 2.523346  | 2.698758  |
| C | 3.669425  | -1.586699 | -1.613889 |
| C | 3.031084  | -2.701903 | 0.520550  |
| C | 3.417665  | 0.596038  | -2.471423 |
| C | 2.394596  | 2.716975  | -1.676230 |
| C | 1.806129  | -2.330743 | 2.473385  |
| C | 0.717319  | 1.489499  | 3.480348  |
| C | 0.374417  | -0.794174 | 3.699838  |
| C | 1.087267  | 3.639332  | 0.677463  |
| C | 0.371052  | 3.322717  | 1.892847  |
| C | 2.944517  | -2.631361 | -0.929964 |
| C | 2.995531  | -0.780021 | -2.654087 |
| C | 1.893069  | -3.141019 | 1.285848  |
| C | 2.484774  | 1.637210  | -2.648619 |
| C | 1.050639  | 3.202109  | -1.724207 |
| C | 0.548150  | -2.068011 | 3.099658  |
| C | -0.701065 | 1.263529  | 3.520203  |
| C | -0.912071 | -0.158144 | 3.705477  |
| C | 0.388214  | 3.719164  | -0.567541 |
| C | -1.041575 | 3.110730  | 1.889743  |
| C | 1.715840  | -3.056901 | -1.521002 |
| C | 1.628386  | -1.069730 | -3.066413 |
| C | 0.707533  | -3.673831 | 0.672841  |
| C | 1.169994  | 1.367883  | -3.164943 |
| C | 0.309367  | 2.403222  | -2.673482 |
| C | -0.603954 | -2.742266 | 2.581950  |
| C | -1.592500 | 2.052877  | 2.748462  |
| C | -2.053578 | -0.804469 | 3.150075  |
| C | -1.026635 | 3.670059  | -0.541711 |
| C | -1.752608 | 3.447861  | 0.689160  |
| C | 0.658268  | -3.665547 | -0.759118 |
| C | 1.097892  | -2.307963 | -2.600787 |
| C | 0.689555  | 0.026526  | -3.342545 |
| C | -0.524493 | -3.540115 | 1.384231  |
| C | -1.091708 | 2.239626  | -2.582829 |

---

|    |           |           |           |
|----|-----------|-----------|-----------|
| C  | -1.894572 | -2.130139 | 2.630589  |
| C  | -2.840751 | 1.431649  | 2.370149  |
| C  | -3.070404 | 0.016229  | 2.556920  |
| C  | -1.779659 | 3.045774  | -1.610320 |
| C  | -3.015641 | 2.848531  | 0.356774  |
| C  | -0.581300 | -3.430702 | -1.444386 |
| C  | -0.304245 | -2.548577 | -2.561002 |
| C  | -0.758584 | -0.192485 | -3.257945 |
| C  | -1.777638 | -3.415693 | 0.693281  |
| C  | -1.664732 | 0.958235  | -3.017879 |
| C  | -2.660739 | -2.575544 | 1.486510  |
| C  | -3.594237 | 1.859113  | 1.225821  |
| C  | -3.965006 | -0.463662 | 1.512028  |
| C  | -3.043947 | 2.636405  | -1.065248 |
| C  | -1.813234 | -3.350729 | -0.732270 |
| C  | -1.235490 | -1.551613 | -2.964383 |
| C  | -3.037534 | 0.711194  | -2.651867 |
| C  | -3.718221 | -1.791986 | 0.914241  |
| C  | -4.330995 | 0.726197  | 0.700421  |
| C  | -3.715912 | 1.505448  | -1.615663 |
| C  | -2.861958 | -2.574537 | -1.323316 |
| C  | -2.575500 | -1.737205 | -2.483387 |
| C  | -3.486316 | -0.649247 | -2.469859 |
| C  | -3.888398 | -1.909847 | -0.526468 |
| C  | -4.455456 | 0.595108  | -0.737172 |
| C  | -4.307875 | -0.740236 | -1.294636 |
| La | 2.043430  | -0.058015 | -0.218844 |
| La | -2.039451 | -0.035274 | -0.229190 |

La<sub>2</sub>@C<sub>2v</sub>(14239)-C<sub>74</sub>

76

|   |          |           |           |
|---|----------|-----------|-----------|
| C | 4.127392 | -0.983483 | -0.976250 |
| C | 3.237569 | -1.923149 | -1.610762 |
| C | 2.750371 | -2.825148 | -0.568192 |
| C | 3.263760 | -2.368239 | 0.719752  |
| C | 4.129530 | -1.245688 | 0.445322  |
| C | 4.050789 | 0.001982  | 1.176272  |



---

|   |           |           |           |
|---|-----------|-----------|-----------|
| C | 4.024778  | 1.068647  | 0.153620  |
| C | 4.019013  | 0.444182  | -1.183669 |
| C | 3.121736  | 0.931165  | -2.233357 |
| C | 2.320885  | -0.049091 | -3.031306 |
| C | 2.345684  | -1.484934 | -2.669023 |
| C | 1.164550  | -2.276637 | -2.855281 |
| C | 0.725868  | -3.256890 | -1.877386 |
| C | 1.462693  | -3.461071 | -0.672958 |
| C | 0.749768  | -3.697385 | 0.540318  |
| C | 1.216657  | -3.136666 | 1.796629  |
| C | 2.405170  | -2.348151 | 1.888427  |
| C | 2.401551  | -1.137191 | 2.752425  |
| C | 3.191934  | 0.064110  | 2.356833  |
| C | 2.629185  | 1.357144  | 2.646984  |
| C | 2.635210  | 2.431948  | 1.668819  |
| C | 3.253164  | 2.276200  | 0.388536  |
| C | 2.625849  | 2.895740  | -0.722494 |
| C | 2.578479  | 2.237773  | -2.035657 |
| C | 1.373556  | 2.664881  | -2.680308 |
| C | 0.675104  | 1.795719  | -3.541445 |
| C | 1.141072  | 0.443617  | -3.693768 |
| C | -0.036350 | -0.381830 | -3.837051 |
| C | -0.020007 | -1.705399 | -3.419948 |
| C | -1.187707 | -2.280739 | -2.815722 |
| C | -0.713133 | -3.255081 | -1.848159 |
| C | -1.425921 | -3.482223 | -0.633553 |
| C | -0.689190 | -3.722780 | 0.564431  |
| C | -1.135534 | -3.170247 | 1.830546  |
| C | 0.044237  | -2.831608 | 2.566312  |
| C | 0.048011  | -1.751034 | 3.436796  |
| C | 1.223968  | -0.920105 | 3.543952  |
| C | 0.754167  | 0.396320  | 3.914142  |
| C | 1.439815  | 1.522135  | 3.439622  |
| C | 0.717404  | 2.674223  | 2.961656  |
| C | 1.420270  | 3.206949  | 1.833890  |
| C | 0.720211  | 3.721028  | 0.697047  |
| C | 1.394284  | 3.635933  | -0.561493 |

---

|    |           |           |           |
|----|-----------|-----------|-----------|
| C  | 0.657220  | 3.533733  | -1.787508 |
| C  | -0.749754 | 3.560447  | -1.787408 |
| C  | -1.461263 | 2.655025  | -2.653612 |
| C  | -0.765305 | 1.785611  | -3.504828 |
| C  | -1.221144 | 0.419679  | -3.637863 |
| C  | -2.394657 | -0.081535 | -2.981045 |
| C  | -2.383434 | -1.523503 | -2.616089 |
| C  | -3.238337 | -1.974197 | -1.536104 |
| C  | -2.718261 | -2.862614 | -0.502246 |
| C  | -3.211974 | -2.406403 | 0.795200  |
| C  | -2.323805 | -2.375483 | 1.941608  |
| C  | -2.314124 | -1.170555 | 2.802099  |
| C  | -1.137973 | -0.940919 | 3.600209  |
| C  | -0.685974 | 0.378295  | 3.949818  |
| C  | -1.394980 | 1.494352  | 3.463400  |
| C  | -0.688802 | 2.635780  | 2.949902  |
| C  | -1.428642 | 3.167877  | 1.842168  |
| C  | -0.758243 | 3.712126  | 0.702037  |
| C  | -1.456008 | 3.640888  | -0.544803 |
| C  | -2.663983 | 2.847880  | -0.674913 |
| C  | -2.646973 | 2.200894  | -1.976369 |
| C  | -3.198345 | 0.886110  | -2.178600 |
| C  | -4.055405 | 0.390793  | -1.102978 |
| C  | -4.115767 | -1.037889 | -0.874739 |
| C  | -4.112481 | -1.310204 | 0.544559  |
| C  | -4.021622 | -0.055513 | 1.257595  |
| C  | -3.126814 | 0.024486  | 2.414296  |
| C  | -2.597433 | 1.319056  | 2.707068  |
| C  | -2.652657 | 2.408145  | 1.721027  |
| C  | -3.278694 | 2.231056  | 0.460463  |
| C  | -4.039827 | 1.013584  | 0.238894  |
| La | -1.816481 | -0.237717 | -0.068697 |
| La | 1.817494  | -0.250907 | -0.024544 |

La<sub>2</sub>@C<sub>s</sub>(13336)-C<sub>74</sub>

76

|   |           |          |          |
|---|-----------|----------|----------|
| C | -4.106557 | 0.663718 | 0.885583 |
|---|-----------|----------|----------|

|   |           |           |           |
|---|-----------|-----------|-----------|
| C | -4.034998 | 1.239879  | -0.463061 |
| C | -4.253437 | -0.793507 | 0.772792  |
| C | -3.310681 | 1.260291  | 1.945675  |
| C | -4.185254 | 0.153437  | -1.400064 |
| C | -3.147779 | 2.335275  | -0.781373 |
| C | -4.307190 | -1.073876 | -0.662661 |
| C | -3.407293 | -1.671966 | 1.603795  |
| C | -2.665211 | 2.490810  | 1.677630  |
| C | -2.678601 | 0.373194  | 2.884526  |
| C | -3.281213 | -0.033574 | -2.504398 |
| C | -2.628634 | 3.062441  | 0.333630  |
| C | -2.345942 | 2.267513  | -2.029120 |
| C | -3.479861 | -2.068531 | -1.325890 |
| C | -2.696934 | -1.063002 | 2.689856  |
| C | -2.734952 | -2.789724 | 0.961022  |
| C | -1.426090 | 2.855204  | 2.345082  |
| C | -1.429739 | 0.725829  | 3.517793  |
| C | -2.362970 | 1.019380  | -2.836645 |
| C | -2.825622 | -1.440723 | -2.460521 |
| C | -1.425690 | 3.826941  | 0.226842  |
| C | -1.177412 | 3.082769  | -2.110346 |
| C | -2.731923 | -2.959091 | -0.502188 |
| C | -1.424465 | -1.581504 | 3.190088  |
| C | -1.430381 | -3.242517 | 1.426388  |
| C | -0.703377 | 3.730742  | 1.474049  |
| C | -0.740407 | 1.942267  | 3.200350  |
| C | -0.706011 | -0.488152 | 3.750552  |
| C | -1.164362 | 0.609586  | -3.487962 |
| C | -1.460510 | -1.789836 | -2.832888 |
| C | -0.721755 | 3.867451  | -0.984829 |
| C | -0.001107 | 2.673065  | -2.839739 |
| C | -1.424456 | -3.387539 | -0.917122 |
| C | -0.732444 | -2.649726 | 2.536201  |
| C | -0.694968 | -3.681074 | 0.285821  |
| C | 0.697370  | 3.731730  | 1.474383  |
| C | 0.736280  | 1.943384  | 3.200819  |
| C | 0.705220  | -0.487144 | 3.751108  |

|    |           |           |           |
|----|-----------|-----------|-----------|
| C  | -0.714836 | -0.780749 | -3.500060 |
| C  | -0.000027 | 1.434722  | -3.483284 |
| C  | -0.730535 | -2.791847 | -2.046852 |
| C  | 0.716854  | 3.868541  | -0.984486 |
| C  | 1.174199  | 3.084459  | -2.109757 |
| C  | 0.735386  | -2.648458 | 2.536524  |
| C  | 0.700557  | -3.679889 | 0.286173  |
| C  | 1.420960  | 2.857258  | 2.345770  |
| C  | 1.420190  | 3.828977  | 0.227538  |
| C  | 1.427260  | 0.727929  | 3.518630  |
| C  | 1.425530  | -1.579417 | 3.190981  |
| C  | 0.718018  | -0.779689 | -3.499685 |
| C  | 1.165505  | 0.611310  | -3.487304 |
| C  | 0.735918  | -2.790640 | -2.046484 |
| C  | 2.343830  | 2.270810  | -2.027835 |
| C  | 1.434845  | -3.240279 | 1.427087  |
| C  | 1.430267  | -3.385270 | -0.916329 |
| C  | 2.660925  | 2.494734  | 1.678882  |
| C  | 2.624247  | 3.066320  | 0.334974  |
| C  | 2.676810  | 0.377125  | 2.885872  |
| C  | 2.697514  | -1.059042 | 2.691299  |
| C  | 1.464920  | -1.787865 | -2.832457 |
| C  | 2.363214  | 1.022778  | -2.835401 |
| C  | 3.144710  | 2.339677  | -0.779714 |
| C  | 2.739210  | -2.786047 | 0.962527  |
| C  | 2.737382  | -2.955697 | -0.500865 |
| C  | 3.307725  | 1.264992  | 1.947081  |
| C  | 3.409333  | -1.666939 | 1.605638  |
| C  | 2.829608  | -1.436937 | -2.459589 |
| C  | 3.282915  | -0.028915 | -2.502929 |
| C  | 4.033050  | 1.245488  | -0.461056 |
| C  | 3.484425  | -2.063938 | -1.324474 |
| C  | 4.104515  | 0.669484  | 0.887340  |
| C  | 4.254228  | -0.787299 | 0.774850  |
| C  | 4.185830  | 0.159428  | -1.397950 |
| C  | 4.309623  | -1.067735 | -0.660593 |
| La | -1.901347 | -0.349456 | -0.180387 |

---

|                                                         |           |           |           |
|---------------------------------------------------------|-----------|-----------|-----------|
| La                                                      | 1.900847  | -0.351681 | -0.181639 |
| La <sub>2</sub> @C <sub>2</sub> (13290)-C <sub>74</sub> |           |           |           |
| 76                                                      |           |           |           |
| C                                                       | -0.091411 | 1.891449  | 3.197092  |
| C                                                       | -0.622632 | 0.637175  | 3.602673  |
| C                                                       | 0.195085  | -0.557198 | 3.566208  |
| C                                                       | -0.641454 | -1.647551 | 3.184397  |
| C                                                       | -0.139578 | -2.695155 | 2.354684  |
| C                                                       | -1.088573 | -3.304877 | 1.473335  |
| C                                                       | -0.678661 | -3.744518 | 0.162401  |
| C                                                       | -1.666693 | -3.386635 | -0.791570 |
| C                                                       | -1.296245 | -2.706337 | -2.018214 |
| C                                                       | -2.181396 | -1.672506 | -2.546802 |
| C                                                       | -1.583280 | -0.527585 | -3.244109 |
| C                                                       | -2.155866 | 0.790870  | -3.088409 |
| C                                                       | -1.317835 | 1.948123  | -2.958617 |
| C                                                       | -1.872835 | 2.791287  | -1.929658 |
| C                                                       | -1.002753 | 3.508616  | -1.048341 |
| C                                                       | -1.385499 | 3.588157  | 0.328175  |
| C                                                       | -0.393380 | 3.536717  | 1.360726  |
| C                                                       | -0.933419 | 2.770977  | 2.456064  |
| C                                                       | 1.317948  | 1.948075  | 2.958645  |
| C                                                       | 1.872979  | 2.791201  | 1.929680  |
| C                                                       | 1.002924  | 3.508560  | 1.048357  |
| C                                                       | 1.385671  | 3.588058  | -0.328165 |
| C                                                       | 0.393555  | 3.536679  | -1.360715 |
| C                                                       | 0.933565  | 2.770949  | -2.456078 |
| C                                                       | 0.091515  | 1.891462  | -3.197112 |
| C                                                       | 0.622670  | 0.637160  | -3.602683 |
| C                                                       | -0.195117 | -0.557165 | -3.566154 |
| C                                                       | 0.641368  | -1.647559 | -3.184338 |
| C                                                       | 0.139429  | -2.695173 | -2.354672 |
| C                                                       | 1.088392  | -3.304953 | -1.473328 |
| C                                                       | 0.678478  | -3.744606 | -0.162396 |
| C                                                       | 1.666521  | -3.386772 | 0.791580  |
| C                                                       | 1.296086  | -2.706392 | 2.018185  |

|   |           |           |           |
|---|-----------|-----------|-----------|
| C | 2.181285  | -1.672594 | 2.546774  |
| C | 1.583241  | -0.527660 | 3.244114  |
| C | 2.155909  | 0.790769  | 3.088428  |
| C | 3.328700  | 1.013293  | 2.270745  |
| C | 3.120155  | 2.219620  | 1.479707  |
| C | 3.504864  | 2.287686  | 0.068583  |
| C | 2.580551  | 2.930035  | -0.809744 |
| C | 2.283958  | 2.399412  | -2.130762 |
| C | 2.844002  | 1.159716  | -2.575935 |
| C | 1.977718  | 0.271767  | -3.303332 |
| C | 1.998429  | -1.156209 | -3.069521 |
| C | 2.940795  | -1.751860 | -2.184440 |
| C | 2.455376  | -2.848959 | -1.376107 |
| C | 2.821393  | -2.957294 | 0.026912  |
| C | 3.777487  | -2.110668 | 0.598294  |
| C | 3.481203  | -1.441511 | 1.874338  |
| C | 4.050009  | -0.098052 | 1.764099  |
| C | 4.618101  | 0.063764  | 0.420263  |
| C | 4.263516  | 1.168894  | -0.468766 |
| C | 3.884846  | 0.563770  | -1.759604 |
| C | 3.965878  | -0.892438 | -1.625557 |
| C | 4.447531  | -1.170859 | -0.283233 |
| C | -3.328646 | 1.013451  | -2.270726 |
| C | -3.120029 | 2.219770  | -1.479694 |
| C | -3.504724 | 2.287836  | -0.068579 |
| C | -2.580397 | 2.930162  | 0.809745  |
| C | -2.283834 | 2.399516  | 2.130756  |
| C | -2.843933 | 1.159850  | 2.575920  |
| C | -1.977697 | 0.271858  | 3.303318  |
| C | -1.998490 | -1.156117 | 3.069527  |
| C | -2.940898 | -1.751718 | 2.184454  |
| C | -2.455544 | -2.848855 | 1.376121  |
| C | -2.821563 | -2.957147 | -0.026904 |
| C | -3.777635 | -2.110488 | -0.598299 |
| C | -3.481299 | -1.441348 | -1.874336 |
| C | -4.050012 | -0.097845 | -1.764073 |
| C | -4.618158 | 0.063982  | -0.420256 |

---

|    |           |           |           |
|----|-----------|-----------|-----------|
| C  | -4.263423 | 1.169075  | 0.468757  |
| C  | -3.884795 | 0.563947  | 1.759590  |
| C  | -3.965925 | -0.892247 | 1.625552  |
| C  | -4.447662 | -1.170648 | 0.283229  |
| La | 2.085384  | -0.091750 | 0.115518  |
| La | -2.085368 | -0.091848 | -0.115539 |

La<sub>2</sub>@C<sub>2</sub>(13291)-C<sub>74</sub>

76

|   |          |           |           |
|---|----------|-----------|-----------|
| C | 4.563905 | -0.900900 | 0.045817  |
| C | 4.001328 | -1.123529 | 1.370523  |
| C | 3.773105 | 0.190045  | 1.973054  |
| C | 4.119124 | 1.204218  | 0.986909  |
| C | 4.623097 | 0.507513  | -0.187069 |
| C | 4.076137 | 0.775084  | -1.512293 |
| C | 3.632216 | -0.494321 | -2.109727 |
| C | 3.979542 | -1.532341 | -1.130054 |
| C | 3.079613 | -2.595614 | -0.902058 |
| C | 2.698029 | -3.009818 | 0.441480  |
| C | 3.062831 | -2.204592 | 1.588657  |
| C | 2.057086 | -2.013524 | 2.594667  |
| C | 1.863922 | -0.731382 | 3.235286  |
| C | 2.657860 | 0.402108  | 2.878429  |
| C | 2.007789 | 1.668247  | 2.857324  |
| C | 2.304247 | 2.642935  | 1.820337  |
| C | 3.286980 | 2.382620  | 0.823096  |
| C | 2.952706 | 2.783475  | -0.531033 |
| C | 3.278345 | 1.923896  | -1.665183 |
| C | 2.148154 | 1.913872  | -2.575928 |
| C | 1.645836 | 0.685394  | -3.150417 |
| C | 2.368769 | -0.566896 | -2.875633 |
| C | 1.584426 | -1.804219 | -2.759196 |
| C | 1.952532 | -2.796866 | -1.778439 |
| C | 0.955485 | -3.518171 | -1.035758 |
| C | 1.389911 | -3.599935 | 0.338006  |
| C | 0.426166 | -3.459179 | 1.382805  |
| C | 0.773069 | -2.653116 | 2.506793  |

|   |           |           |           |
|---|-----------|-----------|-----------|
| C | -0.207793 | -1.796520 | 3.130677  |
| C | 0.457470  | -0.594500 | 3.527362  |
| C | -0.212579 | 0.663145  | 3.478943  |
| C | 0.611757  | 1.807640  | 3.207999  |
| C | 0.098310  | 2.913319  | 2.462396  |
| C | 1.086244  | 3.369529  | 1.532262  |
| C | 0.715022  | 3.692070  | 0.187346  |
| C | 1.680993  | 3.397442  | -0.824416 |
| C | 1.254648  | 2.932327  | -2.122547 |
| C | -0.098084 | 2.913192  | -2.462483 |
| C | -0.611662 | 1.807501  | -3.207965 |
| C | 0.212558  | 0.662900  | -3.478851 |
| C | -0.457618 | -0.594694 | -3.527216 |
| C | 0.207478  | -1.796790 | -3.130585 |
| C | -0.773483 | -2.653186 | -2.506560 |
| C | -0.426656 | -3.459201 | -1.382512 |
| C | -1.390454 | -3.599760 | -0.337714 |
| C | -0.956006 | -3.517958 | 1.036045  |
| C | -1.952984 | -2.796530 | 1.778667  |
| C | -1.584727 | -1.803836 | 2.759335  |
| C | -2.368974 | -0.566434 | 2.875594  |
| C | -1.645826 | 0.685806  | 3.150422  |
| C | -2.147971 | 1.914154  | 2.575751  |
| C | -1.254379 | 2.932583  | 2.122407  |
| C | -1.680714 | 3.397722  | 0.824299  |
| C | -0.714701 | 3.692147  | -0.187448 |
| C | -1.085936 | 3.369534  | -1.532361 |
| C | -2.304023 | 2.643050  | -1.820338 |
| C | -2.007719 | 1.668320  | -2.857297 |
| C | -2.657897 | 0.402227  | -2.878206 |
| C | -1.864096 | -0.731351 | -3.235034 |
| C | -2.057408 | -2.013409 | -2.594362 |
| C | -3.063304 | -2.204343 | -1.588405 |
| C | -2.698539 | -3.009603 | -0.441219 |
| C | -3.080116 | -2.595251 | 0.902346  |
| C | -3.979840 | -1.531797 | 1.130173  |
| C | -3.632250 | -0.493725 | 2.109740  |



---

|    |           |           |           |
|----|-----------|-----------|-----------|
| C  | -4.076038 | 0.775615  | 1.512219  |
| C  | -3.278342 | 1.924454  | 1.665212  |
| C  | -2.952492 | 2.783868  | 0.530982  |
| C  | -3.286817 | 2.382916  | -0.823066 |
| C  | -4.119039 | 1.204577  | -0.986759 |
| C  | -3.773258 | 0.190367  | -1.972969 |
| C  | -4.001680 | -1.123192 | -1.370334 |
| C  | -4.564508 | -0.900458 | -0.045651 |
| C  | -4.623467 | 0.508075  | 0.187187  |
| La | -2.021410 | -0.048933 | 0.141875  |
| La | 2.021904  | -0.048641 | -0.142240 |

La<sub>2</sub>@C<sub>2</sub>(13292)-C<sub>74</sub>

76

|   |          |           |           |
|---|----------|-----------|-----------|
| C | 4.362804 | -0.574218 | -1.305273 |
| C | 3.974497 | -1.750679 | -0.553857 |
| C | 4.008033 | -1.387767 | 0.866810  |
| C | 4.363333 | 0.033156  | 0.971570  |
| C | 4.603103 | 0.508489  | -0.394694 |
| C | 3.966211 | 1.700916  | -0.940887 |
| C | 3.284962 | 1.335921  | -2.192648 |
| C | 3.580458 | -0.075029 | -2.425079 |
| C | 2.571989 | -0.933938 | -2.927765 |
| C | 2.280629 | -2.212183 | -2.313310 |
| C | 2.916472 | -2.606613 | -1.074009 |
| C | 2.100249 | -3.284574 | -0.130966 |
| C | 2.184889 | -3.003694 | 1.290517  |
| C | 3.047934 | -1.982554 | 1.788477  |
| C | 2.534977 | -1.150665 | 2.833201  |
| C | 2.799797 | 0.273020  | 2.859467  |
| C | 3.644311 | 0.900833  | 1.894319  |
| C | 3.193675 | 2.193413  | 1.392962  |
| C | 3.290575 | 2.534549  | -0.023696 |
| C | 2.081214 | 3.233558  | -0.422365 |
| C | 1.380517 | 2.897063  | -1.646197 |
| C | 1.959972 | 1.886865  | -2.527991 |
| C | 1.045901 | 1.013608  | -3.269420 |

|   |           |           |           |
|---|-----------|-----------|-----------|
| C | 1.349762  | -0.379442 | -3.435398 |
| C | 0.325119  | -1.390479 | -3.302531 |
| C | 0.875743  | -2.478433 | -2.551544 |
| C | 0.065236  | -3.184088 | -1.617132 |
| C | 0.725924  | -3.644733 | -0.429721 |
| C | 0.028601  | -3.710630 | 0.811862  |
| C | 0.869936  | -3.224699 | 1.857963  |
| C | 0.332229  | -2.367205 | 2.869560  |
| C | 1.209168  | -1.362215 | 3.381623  |
| C | 0.700340  | -0.089940 | 3.792395  |
| C | 1.613185  | 0.928607  | 3.394505  |
| C | 1.132264  | 2.164585  | 2.854671  |
| C | 1.961985  | 2.793581  | 1.872217  |
| C | 1.358439  | 3.503429  | 0.778289  |
| C | -0.025872 | 3.721891  | 0.750570  |
| C | -0.727892 | 3.636147  | -0.487273 |
| C | -0.071478 | 3.156890  | -1.669366 |
| C | -0.885534 | 2.435942  | -2.589273 |
| C | -0.337585 | 1.335011  | -3.322790 |
| C | -1.362589 | 0.322158  | -3.435799 |
| C | -1.057985 | -1.068469 | -3.249158 |
| C | -1.969896 | -1.929730 | -2.490779 |
| C | -1.386865 | -2.924584 | -1.593665 |
| C | -2.082613 | -3.240793 | -0.361943 |
| C | -1.355403 | -3.490671 | 0.840424  |
| C | -1.954844 | -2.762078 | 1.924299  |
| C | -1.122128 | -2.117590 | 2.894059  |
| C | -1.601212 | -0.873140 | 3.415523  |
| C | -0.687185 | 0.152036  | 3.793888  |
| C | -1.197323 | 1.417256  | 3.363769  |
| C | -0.322287 | 2.413344  | 2.831641  |
| C | -0.863592 | 3.253332  | 1.807222  |
| C | -2.180580 | 3.023836  | 1.248357  |
| C | -2.101413 | 3.281700  | -0.177690 |
| C | -2.921472 | 2.588818  | -1.106677 |
| C | -2.289731 | 2.173633  | -2.341713 |
| C | -2.583555 | 0.885246  | -2.934046 |

---

|    |           |           |           |
|----|-----------|-----------|-----------|
| C  | -3.591632 | 0.034518  | -2.415027 |
| C  | -3.294530 | -1.373162 | -2.160335 |
| C  | -3.969463 | -1.716451 | -0.898845 |
| C  | -3.290143 | -2.534557 | 0.029517  |
| C  | -3.187755 | -2.170069 | 1.439493  |
| C  | -3.635476 | -0.869259 | 1.920240  |
| C  | -2.789189 | -0.226329 | 2.873263  |
| C  | -2.524841 | 1.196453  | 2.822579  |
| C  | -3.041241 | 2.010467  | 1.765773  |
| C  | -4.004406 | 1.400967  | 0.857160  |
| C  | -3.977754 | 1.741458  | -0.569254 |
| C  | -4.369726 | 0.552582  | -1.300440 |
| C  | -4.603777 | -0.515005 | -0.370261 |
| C  | -4.358142 | -0.017397 | 0.986340  |
| La | 2.077643  | 0.073570  | -0.212880 |
| La | -2.077362 | -0.074857 | -0.220352 |

Sc<sub>3</sub>N@C<sub>74</sub> isomers:

Sc<sub>3</sub>N@C<sub>2</sub>(13333)-C<sub>74</sub>

78

|   |           |           |           |
|---|-----------|-----------|-----------|
| C | -4.528482 | -0.068099 | 0.013367  |
| C | -4.053647 | -1.329323 | 0.556097  |
| C | -3.500774 | -2.092416 | -0.557411 |
| C | -3.542381 | -1.252788 | -1.754018 |
| C | -4.191186 | -0.023917 | -1.393374 |
| C | -3.563999 | 1.239652  | -1.692579 |
| C | -3.534823 | 2.016548  | -0.445393 |
| C | -4.108979 | 1.185523  | 0.596714  |
| C | -3.464228 | 1.167741  | 1.858391  |
| C | -3.139338 | -0.088067 | 2.503081  |
| C | -3.354500 | -1.349077 | 1.833549  |
| C | -2.370267 | -2.368973 | 2.040028  |
| C | -1.945458 | -3.233192 | 0.962753  |
| C | -2.433729 | -3.048052 | -0.367048 |
| C | -1.528545 | -3.239974 | -1.445550 |
| C | -1.543945 | -2.354691 | -2.605464 |
| C | -2.444012 | -1.245683 | -2.687085 |

---

|   |           |           |           |
|---|-----------|-----------|-----------|
| C | -1.943798 | 0.049111  | -3.192766 |
| C | -2.463313 | 1.304036  | -2.604368 |
| C | -1.590914 | 2.432952  | -2.468687 |
| C | -1.580578 | 3.241210  | -1.242326 |
| C | -2.474512 | 2.949352  | -0.160405 |
| C | -1.952075 | 3.041586  | 1.204215  |
| C | -2.442682 | 2.129985  | 2.185391  |
| C | -1.565093 | 1.507606  | 3.159698  |
| C | -1.975593 | 0.143011  | 3.326129  |
| C | -1.010595 | -0.890253 | 3.535827  |
| C | -1.244915 | -2.157362 | 2.909739  |
| C | -0.146891 | -2.931853 | 2.411423  |
| C | -0.568028 | -3.585154 | 1.194838  |
| C | 0.352972  | -3.847845 | 0.118066  |
| C | -0.162702 | -3.624149 | -1.201766 |
| C | 0.664719  | -3.000975 | -2.232579 |
| C | -0.212020 | -2.244196 | -3.086981 |
| C | 0.240247  | -1.058282 | -3.682489 |
| C | -0.630779 | 0.086259  | -3.729522 |
| C | 0.217042  | 1.250734  | -3.608829 |
| C | -0.256935 | 2.395369  | -2.948358 |
| C | 0.603518  | 3.158278  | -2.066691 |
| C | -0.252951 | 3.760491  | -1.047500 |
| C | 0.254915  | 3.993308  | 0.281854  |
| C | -0.586549 | 3.519252  | 1.372143  |
| C | 0.268068  | 2.912844  | 2.365612  |
| C | -0.195473 | 1.869037  | 3.246952  |
| C | 0.744635  | 0.873543  | 3.633359  |
| C | 0.341059  | -0.499494 | 3.749152  |
| C | 1.443235  | -1.320044 | 3.314084  |
| C | 1.215114  | -2.530341 | 2.599123  |
| C | 2.172900  | -2.925893 | 1.582345  |
| C | 1.770875  | -3.613919 | 0.348405  |
| C | 2.607961  | -3.043391 | -0.737392 |
| C | 2.015082  | -2.620017 | -2.004264 |
| C | 2.484722  | -1.366086 | -2.656184 |
| C | 1.580614  | -0.619511 | -3.472272 |

---

|    |           |           |           |
|----|-----------|-----------|-----------|
| C  | 1.557311  | 0.839190  | -3.419979 |
| C  | 2.452513  | 1.567610  | -2.565888 |
| C  | 1.952003  | 2.736032  | -1.799359 |
| C  | 2.515538  | 3.032789  | -0.456859 |
| C  | 1.633607  | 3.622169  | 0.576465  |
| C  | 1.618089  | 2.961574  | 1.881212  |
| C  | 2.561226  | 1.931680  | 2.273583  |
| C  | 2.104618  | 0.910294  | 3.163845  |
| C  | 2.542243  | -0.446861 | 2.982447  |
| C  | 3.496532  | -0.787702 | 1.984700  |
| C  | 3.275379  | -2.042062 | 1.281822  |
| C  | 3.566227  | -2.161870 | -0.126645 |
| C  | 4.142122  | -1.062569 | -0.817815 |
| C  | 3.542119  | -0.630174 | -2.056820 |
| C  | 3.548722  | 0.832853  | -2.052308 |
| C  | 4.185656  | 1.245031  | -0.850808 |
| C  | 3.572402  | 2.194235  | 0.003768  |
| C  | 3.593894  | 1.619647  | 1.363422  |
| C  | 4.122988  | 0.281658  | 1.269311  |
| C  | 4.531472  | 0.083971  | -0.089073 |
| Sc | -2.244384 | -0.061035 | -0.158595 |
| Sc | 0.447697  | 1.791828  | 0.015249  |
| Sc | 1.021933  | -1.538413 | 0.036424  |
| N  | -0.236582 | -0.047344 | 0.015576  |

Sc<sub>3</sub>N@C<sub>2</sub>(13295)-C<sub>74</sub>

78

|   |          |           |           |
|---|----------|-----------|-----------|
| C | 4.331520 | -1.137055 | -0.973169 |
| C | 4.012907 | -1.615261 | 0.365599  |
| C | 3.985393 | -0.451745 | 1.249028  |
| C | 4.223853 | 0.731652  | 0.443996  |
| C | 4.447760 | 0.289017  | -0.910896 |
| C | 3.691876 | 0.870105  | -1.991692 |
| C | 3.026258 | -0.198052 | -2.717117 |
| C | 3.462085 | -1.445284 | -2.099035 |
| C | 2.493052 | -2.449505 | -1.914367 |
| C | 2.358622 | -3.153517 | -0.648258 |

|   |           |           |           |
|---|-----------|-----------|-----------|
| C | 3.029241  | -2.652626 | 0.542704  |
| C | 2.297606  | -2.664314 | 1.766561  |
| C | 2.360944  | -1.555574 | 2.697640  |
| C | 3.132629  | -0.393713 | 2.411550  |
| C | 2.596383  | 0.887674  | 2.773605  |
| C | 2.761321  | 2.035638  | 1.916272  |
| C | 3.502208  | 1.956262  | 0.703967  |
| C | 2.986344  | 2.673270  | -0.429758 |
| C | 3.023974  | 2.087075  | -1.749736 |
| C | 1.806064  | 2.374604  | -2.433416 |
| C | 1.126047  | 1.338246  | -3.181325 |
| C | 1.669116  | -0.019454 | -3.232938 |
| C | 0.759513  | -1.159537 | -3.203599 |
| C | 1.204628  | -2.375374 | -2.555798 |
| C | 0.319612  | -3.197714 | -1.798339 |
| C | 1.020844  | -3.637817 | -0.591332 |
| C | 0.330376  | -3.698665 | 0.650880  |
| C | 0.976752  | -3.224261 | 1.831500  |
| C | 0.238150  | -2.496973 | 2.832761  |
| C | 1.079923  | -1.450385 | 3.341690  |
| C | 0.532224  | -0.176161 | 3.680478  |
| C | 1.311807  | 0.990405  | 3.402460  |
| C | 0.682444  | 2.218398  | 2.966759  |
| C | 1.567863  | 2.855380  | 2.012969  |
| C | 1.057263  | 3.620767  | 0.898364  |
| C | 1.758791  | 3.428092  | -0.342408 |
| C | 1.066034  | 3.282966  | -1.610320 |
| C | -0.350553 | 3.367155  | -1.677876 |
| C | -1.003809 | 2.563220  | -2.648088 |
| C | -0.262862 | 1.504603  | -3.329422 |
| C | -1.137197 | 0.387323  | -3.477064 |
| C | -0.676609 | -0.949277 | -3.278619 |
| C | -1.610680 | -1.908817 | -2.649274 |
| C | -1.093885 | -3.015479 | -1.837542 |
| C | -1.842791 | -3.455802 | -0.657009 |
| C | -1.104385 | -3.611091 | 0.592099  |
| C | -1.853628 | -2.979075 | 1.651437  |

---

|    |           |           |           |
|----|-----------|-----------|-----------|
| C  | -1.172629 | -2.322316 | 2.740519  |
| C  | -1.735545 | -1.103032 | 3.224880  |
| C  | -0.885952 | -0.028883 | 3.644580  |
| C  | -1.510319 | 1.210739  | 3.248531  |
| C  | -0.748280 | 2.371099  | 2.888881  |
| C  | -1.281732 | 3.259512  | 1.856943  |
| C  | -0.386005 | 3.866356  | 0.842738  |
| C  | -1.052821 | 3.695613  | -0.449838 |
| C  | -2.349225 | 3.116865  | -0.238156 |
| C  | -3.069144 | 2.395900  | -1.257123 |
| C  | -2.355693 | 2.129772  | -2.479687 |
| C  | -2.452510 | 0.820903  | -3.077208 |
| C  | -3.383677 | -0.100757 | -2.617112 |
| C  | -2.955286 | -1.465742 | -2.377887 |
| C  | -3.705929 | -1.927963 | -1.218721 |
| C  | -3.115156 | -2.841042 | -0.311540 |
| C  | -3.092743 | -2.482494 | 1.105035  |
| C  | -3.619071 | -1.201138 | 1.567058  |
| C  | -2.921910 | -0.539631 | 2.624840  |
| C  | -2.781804 | 0.890842  | 2.636237  |
| C  | -3.287913 | 1.688107  | 1.571106  |
| C  | -2.479362 | 2.819541  | 1.165565  |
| C  | -4.087339 | 1.055189  | 0.580421  |
| C  | -4.039719 | 1.450379  | -0.816944 |
| C  | -4.314913 | 0.281778  | -1.601840 |
| C  | -4.492397 | -0.831982 | -0.734898 |
| C  | -4.300369 | -0.381561 | 0.615394  |
| Sc | 2.208432  | -0.364455 | -0.482752 |
| Sc | -1.390085 | -1.303058 | -0.130350 |
| Sc | -0.237684 | 1.652318  | 0.635760  |
| N  | 0.214367  | -0.139026 | -0.004283 |

Ca<sub>2</sub>@C<sub>74</sub> isomers:

Ca<sub>2</sub>@ C<sub>2</sub>(13333)-C<sub>74</sub>

76

|   |           |           |           |
|---|-----------|-----------|-----------|
| C | -4.556664 | -0.016245 | -0.035885 |
| C | -4.133291 | -0.859784 | 1.057007  |

|   |           |           |           |
|---|-----------|-----------|-----------|
| C | -3.579937 | -2.075207 | 0.454916  |
| C | -3.587293 | -1.897536 | -0.987469 |
| C | -4.226499 | -0.652533 | -1.272803 |
| C | -3.582551 | 0.305303  | -2.134181 |
| C | -3.569490 | 1.591909  | -1.449561 |
| C | -4.153446 | 1.367551  | -0.123413 |
| C | -3.556496 | 1.967741  | 1.000457  |
| C | -3.257087 | 1.173523  | 2.184710  |
| C | -3.473173 | -0.262252 | 2.195675  |
| C | -2.460516 | -1.045257 | 2.850760  |
| C | -2.027712 | -2.326612 | 2.336699  |
| C | -2.518067 | -2.812772 | 1.080320  |
| C | -1.610070 | -3.526137 | 0.245315  |
| C | -1.605619 | -3.300944 | -1.179306 |
| C | -2.488361 | -2.362603 | -1.795058 |
| C | -1.963820 | -1.486422 | -2.853761 |
| C | -2.478277 | -0.101522 | -2.950789 |
| C | -1.577682 | 0.937272  | -3.333275 |
| C | -1.585320 | 2.227457  | -2.705762 |
| C | -2.484436 | 2.515991  | -1.636441 |
| C | -1.963918 | 3.250967  | -0.470089 |
| C | -2.497197 | 2.946460  | 0.823752  |
| C | -1.621237 | 2.848550  | 1.955111  |
| C | -2.057887 | 1.730386  | 2.763404  |
| C | -1.099786 | 0.943442  | 3.475255  |
| C | -1.344205 | -0.464577 | 3.546607  |
| C | -0.254917 | -1.402222 | 3.521173  |
| C | -0.673742 | -2.542952 | 2.755846  |
| C | 0.247474  | -3.229461 | 1.902921  |
| C | -0.234879 | -3.725575 | 0.658740  |
| C | 0.607296  | -3.695366 | -0.502710 |
| C | -0.250368 | -3.446381 | -1.634758 |
| C | 0.211907  | -2.705456 | -2.709757 |
| C | -0.645133 | -1.732861 | -3.330671 |
| C | 0.218538  | -0.654214 | -3.743596 |
| C | -0.218507 | 0.654346  | -3.743575 |
| C | 0.645161  | 1.732978  | -3.330606 |



|    |           |           |           |
|----|-----------|-----------|-----------|
| C  | -0.211884 | 2.705551  | -2.709665 |
| C  | 0.250383  | 3.446438  | -1.634637 |
| C  | -0.607291 | 3.695385  | -0.502588 |
| C  | 0.234874  | 3.725553  | 0.658869  |
| C  | -0.247488 | 3.229397  | 1.903029  |
| C  | 0.673721  | 2.542859  | 2.755937  |
| C  | 0.254890  | 1.402103  | 3.521222  |
| C  | 1.344178  | 0.464457  | 3.546633  |
| C  | 1.099760  | -0.943560 | 3.475231  |
| C  | 2.057867  | -1.730479 | 2.763361  |
| C  | 1.621223  | -2.848617 | 1.955028  |
| C  | 2.497193  | -2.946488 | 0.823672  |
| C  | 1.963924  | -3.250950 | -0.470184 |
| C  | 2.484452  | -2.515934 | -1.636507 |
| C  | 1.585342  | -2.227361 | -2.705825 |
| C  | 1.577709  | -0.937154 | -3.333294 |
| C  | 2.478304  | 0.101626  | -2.950767 |
| C  | 1.963845  | 1.486523  | -2.853695 |
| C  | 2.488378  | 2.362667  | -1.794958 |
| C  | 1.605629  | 3.300986  | -1.179180 |
| C  | 1.610069  | 3.526130  | 0.245448  |
| C  | 2.518058  | 2.812735  | 1.080435  |
| C  | 2.027693  | 2.326533  | 2.336793  |
| C  | 2.460492  | 1.045160  | 2.850813  |
| C  | 3.473151  | 0.262178  | 2.195706  |
| C  | 3.257069  | -1.173596 | 2.184693  |
| C  | 3.556489  | -1.967773 | 1.000418  |
| C  | 4.153449  | -1.367546 | -0.123428 |
| C  | 3.569507  | -1.591859 | -1.449589 |
| C  | 3.582573  | -0.305227 | -2.134166 |
| C  | 4.226512  | 0.652579  | -1.272749 |
| C  | 3.587303  | 1.897572  | -0.987376 |
| C  | 3.579932  | 2.075191  | 0.455014  |
| C  | 4.133279  | 0.859748  | 1.057066  |
| C  | 4.556665  | 0.016248  | -0.035850 |
| Ca | -1.914663 | 0.035530  | 0.012005  |
| Ca | 1.914651  | -0.035549 | 0.011962  |

Ca<sub>2</sub>@ C<sub>2</sub>(13295)-C<sub>74</sub>

76

|   |          |           |           |
|---|----------|-----------|-----------|
| C | 4.317354 | -0.792784 | -1.321957 |
| C | 4.032379 | -1.655110 | -0.217728 |
| C | 4.109266 | -0.849991 | 1.003629  |
| C | 4.372972 | 0.538114  | 0.607319  |
| C | 4.527980 | 0.540917  | -0.835857 |
| C | 3.768361 | 1.437204  | -1.664126 |
| C | 3.031245 | 0.638047  | -2.680140 |
| C | 3.424002 | -0.734148 | -2.463433 |
| C | 2.465716 | -1.746533 | -2.609638 |
| C | 2.323839 | -2.792659 | -1.618904 |
| C | 3.015987 | -2.695095 | -0.365196 |
| C | 2.299710 | -3.093726 | 0.806386  |
| C | 2.398932 | -2.328185 | 2.025589  |
| C | 3.215940 | -1.143438 | 2.101897  |
| C | 2.691690 | -0.055830 | 2.863315  |
| C | 2.861816 | 1.309905  | 2.405407  |
| C | 3.640298 | 1.621302  | 1.233740  |
| C | 3.099164 | 2.665155  | 0.394103  |
| C | 3.112504 | 2.511949  | -1.061648 |
| C | 1.859700 | 2.986175  | -1.580443 |
| C | 1.145365 | 2.255066  | -2.588679 |
| C | 1.681210 | 0.971047  | -3.048677 |
| C | 0.727218 | -0.117768 | -3.336708 |
| C | 1.162373 | -1.450279 | -3.134212 |
| C | 0.248185 | -2.468657 | -2.654863 |
| C | 0.951751 | -3.247259 | -1.676412 |
| C | 0.275061 | -3.713460 | -0.510667 |
| C | 0.969087 | -3.638442 | 0.737059  |
| C | 0.261279 | -3.265387 | 1.927467  |
| C | 1.131869 | -2.415197 | 2.695023  |
| C | 0.608494 | -1.313252 | 3.448838  |
| C | 1.415210 | -0.139089 | 3.528734  |
| C | 0.806510 | 1.159198  | 3.498382  |
| C | 1.687747 | 2.045546  | 2.773396  |

|   |           |           |           |
|---|-----------|-----------|-----------|
| C | 1.156543  | 3.067948  | 1.926439  |
| C | 1.881689  | 3.349503  | 0.729309  |
| C | 1.142353  | 3.588731  | -0.495510 |
| C | -0.275056 | 3.713488  | -0.510590 |
| C | -0.951735 | 3.247315  | -1.676354 |
| C | -0.248163 | 2.468738  | -2.654820 |
| C | -1.162347 | 1.450365  | -3.134190 |
| C | -0.727189 | 0.117858  | -3.336705 |
| C | -1.681184 | -0.970963 | -3.048704 |
| C | -1.145345 | -2.254993 | -2.588732 |
| C | -1.859690 | -2.986130 | -1.580523 |
| C | -1.142349 | -3.588704 | -0.495597 |
| C | -1.881694 | -3.349504 | 0.729221  |
| C | -1.156558 | -3.067981 | 1.926366  |
| C | -1.687771 | -2.045599 | 2.773341  |
| C | -0.806543 | -1.159266 | 3.498353  |
| C | -1.415242 | 0.139020  | 3.528732  |
| C | -0.608526 | 1.313186  | 3.448866  |
| C | -1.131894 | 2.415145  | 2.695066  |
| C | -0.261295 | 3.265347  | 1.927530  |
| C | -0.969093 | 3.638434  | 0.737129  |
| C | -2.299717 | 3.093719  | 0.806437  |
| C | -3.015976 | 2.695106  | -0.365160 |
| C | -2.323822 | 2.792705  | -1.618860 |
| C | -2.465693 | 1.746603  | -2.609618 |
| C | -3.423977 | 0.734213  | -2.463438 |
| C | -3.031222 | -0.637976 | -2.680174 |
| C | -3.768350 | -1.437158 | -1.664187 |
| C | -3.112501 | -2.511921 | -1.061727 |
| C | -3.099174 | -2.665157 | 0.394023  |
| C | -3.640324 | -1.621328 | 1.233684  |
| C | -2.861842 | -1.309951 | 2.405360  |
| C | -2.691713 | 0.055775  | 2.863295  |
| C | -3.215954 | 1.143400  | 2.101894  |
| C | -2.398952 | 2.328152  | 2.025622  |
| C | -4.109270 | 0.849973  | 1.003615  |
| C | -4.032362 | 1.655114  | -0.217723 |

|    |           |           |           |
|----|-----------|-----------|-----------|
| C  | -4.317338 | 0.792821  | -1.321971 |
| C  | -4.527976 | -0.540891 | -0.835903 |
| C  | -4.372989 | -0.538123 | 0.607278  |
| Ca | 2.029963  | 0.025429  | -0.252329 |
| Ca | -2.029955 | -0.025534 | -0.252292 |
